# Supplementary material for: Sexual Dimorphism in the Fibular Extremities of Italians and South Africans of Identified Modern Human Skeletal Collections: A Geometric Morphometric Approach
Source: MDPI journal article supplement (doi:10.3390/biology11071079), 2022-07-19
Supplement: s1 [file s1]

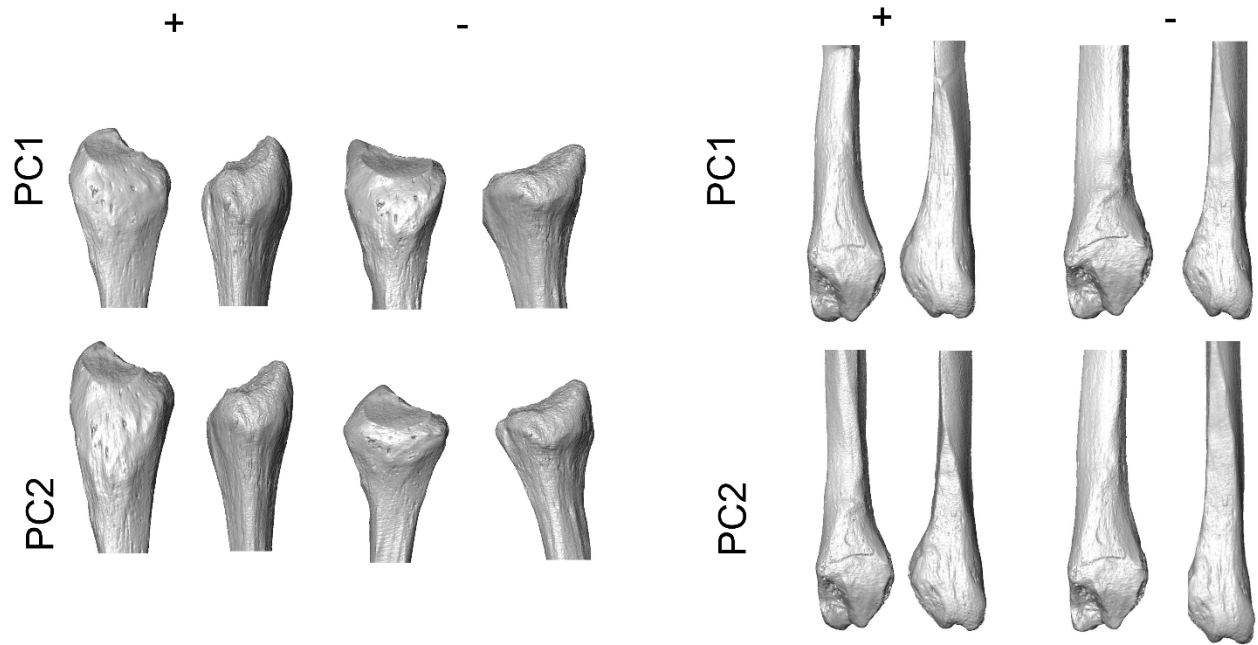

**Figure S1.** Shape-space morphings along PC1 and PC2 for both proximal (on the left) and distal epiphyses (on the right) computed considering all populations pooled together considering extreme positive and negatives shapes.

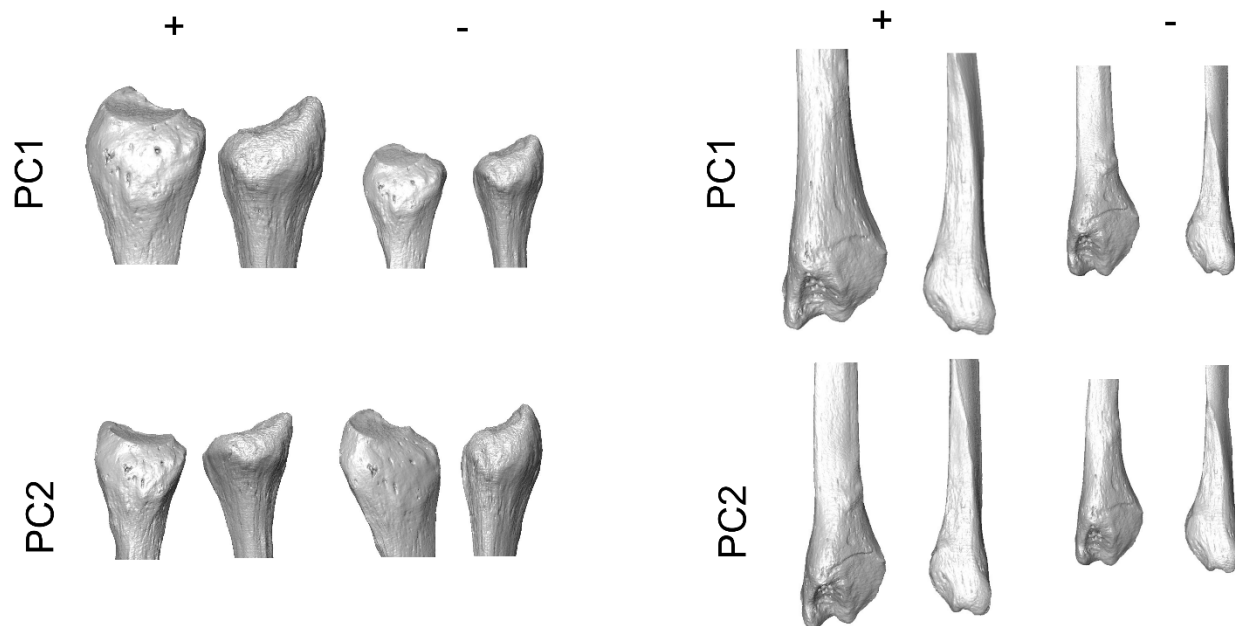

**Figure S2.** Form-space morphings along PC1 and PC2 for both proximal (on the left) and distal epiphyses (on the right) computed considering all populations pooled together considering extreme positive and negative forms.
