# Supplementary material for: Sexual Dimorphism in the Fibular Extremities of Italians and South Africans of Identified Modern Human Skeletal Collections: A Geometric Morphometric Approach
Source: Biology (Basel). 2022 Jul 19;11(7):1079. doi: 10.3390/biology11071079 (PMC9312998; doi:10.3390/biology11071079)
Supplement: Supplementary file 1 [file biology-11-01079-s001.zip › S1_Appendix.CSV]

106	7752099;7	443675559;-256	1402525
95	31472432;12	65431212;-328	0705102
112	9619241;0	999256319;-347	7417941
108	7119706;3	609662225;-355	2584179
112	1061759;7	910564317;-348	2398192
95	7295141;18	44714167;-333	4614074
97	19136142;17	58280045;-343	5628379
99	11561734;10	99201066;-353	9732764
108	3794042;15	17226139;-345	1128094
110	7995148;16	48290662;-336	3976943
101	2556427;19	46663874;-11	99941141
107	990772;15	88881079;-286	146349
105	4174316;9	466979218;-273	3332275
103	7185303;11	09030762;-286	2652344
102	6611084;12	19794693;-297	7180664
101	4433716;12	67738037;-308	2717773
110	0859131;5	178159332;-274	6787598
111	258728;4	368563843;-288	2244873
111	2246704;4	235243988;-300	5257324
110	0111694;3	837344742;-311	3384033
95	70389404;18	02220764;-338	6182373
97	30922241;13	06901398;-349	5870361
104	799231;12	91217041;-349	0277832
109	9541382;16	05196533;-340	7897461
101	4765015;18	83816833;-330	6275635
101	6774048;17	15133362;-344	7438721
97	97634277;19	83350372;-13	8813324
92	81433716;20	94828949;-16	44721832
90	37819214;24	88435211;-19	10962982
96	19436646;27	912146;-19	4754364
102	6524048;29	45494385;-17	56519775
104	2146606;24	0538269;-13	33774719
109	9222168;3	750650406;-320	9708984
110	2305786;2	898070145;-329	2445801
100	5088928;12	7006073;-318	2955078
112	0768921;2	13969326;-337	9357666
107	5215698;18	09199524;-331	5304688
107	1859375;17	7078476;-337	072876
100	6544617;18	7154953;-335	9664307
106	5727783;17	11985931;-342	1969238
100	6744385;18	23723602;-341	1770996
104	3268311;14	70305786;-347	4830566
99	22770996;15	81161499;-347	2237549
100	4345154;13	73378448;-350	0069092
107	118457;7	147415924;-282	1591309
105	2176636;8	932518005;-291	2334473
107	651001;5	411743164;-295	4245117
103	5490356;10	15628662;-301	6614746
106	2991821;5	620894241;-304	5737061
102	8053223;9	700122833;-311	5048096
107	7977661;7	698706818;-315	4841309
100	1824463;9	890708923;-321	0784912
104	6526001;4	898871613;-322	9044678
95	79505005;9	791647339;-329	2367432
99	86271973;5	976558685;-330	3301758
104	7863403;1	775969696;-332	1498779
93	66607666;11	67680969;-333	4482422
95	81707764;6	115140915;-337	4165527
100	2513;2	311480904;-340	3284424
106	7554443;-0	142061734;-343	1885254
93	21162109;13	43561707;-338	9471436
94	94004517;8	340033722;-343	3281738
98	91192627;2	955642319;-345	8294434
106	4539673;-1	610835648;-349	1016602
96	18245239;10	74705353;-347	0242432
97	90534668;5	6787323;-351	5710693
111	11698;13	70948944;-342	3999268
113	1540527;10	86147537;-342	76521
109	0460693;12	62158966;-344	4888672
112	5730591;8	9861763;-344	9261475
107	2530884;11	94442139;-346	9439697
107	3794189;9	335762024;-348	0488281
111	222644;8	339982605;-346	0972168
107	0217529;15	55980835;-291	3959717
110	6515747;16	29335938;-295	9850098
105	9713501;15	68480988;-299	8602783
108	9466187;15	88704987;-305	1897217
112	4787354;16	17263947;-308	3857422
104	8378296;15	39975281;-310	3712891
109	1928345;16	17996063;-313	9338867
112	9825317;16	48502502;-318	1128418
102	3021912;16	13906403;-321	8345215
106	468396;17	64867249;-324	0294922
111	338855;17	35610504;-325	4936035
115	1253784;15	73084869;-328	6829346
100	6587463;17	1253006;-327	6120117
118	3163086;10	55018387;-302	8116943
117	7943604;11	04741211;-311	2898193
115	0729004;7	662609863;-315	6803955
116	8548096;11	38616638;-320	3324219
114	6943848;7	470585632;-323	3141113
112	6141235;5	125055313;-327	0074707
116	5758789;11	68501968;-326	4824707
116	3732056;8	104570007;-331	4602051
114	5796875;4	630152512;-335	7137207
117	5714844;12	76593399;-333	2715088
102	2079529;3	165889168;-353	1675049
108	6688843;1	033897495;-353	3814697
117	208252;8	767358398;-337	7270996
115	1813354;3	944345474;-341	8544678
115	1998169;3	87938118;-347	5703613
100	4699585;22	47969513;-14	29235229
97	40949097;22	37489777;-15	53422089
93	97649536;23	47364197;-17	16592102
100	5956848;26	48867188;-16	47942352
96	64414063;25	73536377;-17	39990234
102	5314118;17	39830934;-9	919219804
87	14506045;24	63045741;-30	57988313
108	9105428;26	56987681;-25	71691391
97	84073485;8	635416121;-28	92539673
88	10302124;13	55645447;-23	84682617
84	7369812;25	18059235;-25	28208923
88	28267822;16	90082855;-19	52471619
99	60828247;9	087606049;-19	88742523
101	3932129;13	17182617;-12	44687653
96	86311646;30	13820496;-22	49350586
91	51786499;28	68981018;-23	21004791
87	56843262;28	64713135;-26	4664856
107	4925171;17	1861908;-17	03459167
94	15584106;11	72728882;-18	49102173
100	9931335;31	90476379;-23	65746613
103	9364136;10	15729904;-18	45400848
94	34916992;30	95055847;-26	21303711
107	0016846;13	89498444;-19	44157715
107	0740723;26	73349609;-18	92467194
92	69682007;9	881087494;-22	77467499
106	0797485;29	34810181;-22	34734802
101	4967224;30	64621582;-20	24105682
106	4819214;13	17970428;-15	84312134
107	0889893;21	5043457;-16	27207794
104	2384521;10	55637589;-21	73940277
98	11780396;8	291164398;-23	4131424
91	22998657;11	37610245;-27	18047485
106	0205933;13	76795807;-12	09380798
98	77477417;12	13371429;-15	98894501
107	1437622;17	85305176;-13	59247589
86	17755127;20	08675537;-22	71421967
108	2318237;19	36651306;-20	58826294
87	54251099;19	09259186;-26	91440735
103	7652344;11	24075012;-14	8211792
102	4677124;9	136043549;-24	56512146
108	3914307;23	39455261;-21	03996735
124	4832886;9	886042786;-240	3298096
121	170105;11	96386414;-302	7545654
131	2130859;-6	017031097;-315	8412354
128	8315308;-0	416746473;-322	9394531
135	5084595;1	073783016;-318	2185791
124	8234863;19	39661102;-305	010791
126	4112915;16	34588928;-313	6837646
127	3833252;7	947386169;-322	2299316
134	6777832;11	3683342;-313	8710205
136	3280151;12	89613342;-305	6713623
114	526062;16	2663269;-7	839964294
130	4482178;14	85674438;-261	4978271
125	4137817;11	02608948;-254	8711182
125	5099854;10	57336884;-265	8988037
125	2533691;10	57195358;-275	2795898
124	4740479;11	0050293;-284	1398193
127	4318237;5	216044617;-255	9353027
128	1752808;3	85295105;-267	2637207
128	951123;2	430236244;-277	1033203
128	9772461;1	460758686;-286	3050537
125	9062378;18	50493317;-309	4737793
125	9064941;12	01265564;-319	1771484
132	2064575;9	578926086;-317	4161621
136	4092773;11	84893646;-309	8936523
128	582605;17	83978271;-301	780957
130	2280029;14	95220947;-313	0105225
109	1313599;16	11949005;-10	80522079
104	1375854;18	7512207;-13	5028656
103	4506714;23	22308655;-15	63044434
110	3187378;25	397966;-17	0431488
117	3347656;25	10267792;-14	72431793
117	407605;19	81963043;-10	30505829
128	7592285;0	238421822;-295	0489502
129	1943237;-1	611366081;-302	4304688
123	6359863;11	59263306;-293	1091064
129	9810059;-4	104704666;-309	0986816
133	6676758;14	77866974;-301	4195801
133	6178833;14	26069336;-306	5741211
128	809668;17	45643311;-306	2733398
133	4473145;13	45492096;-311	0783936
129	2727783;16	3305481;-310	3791992
132	1120605;11	751017;-315	9779541
128	0737183;13	98851471;-316	0652832
129	0751465;11	50179214;-318	6500488
126	2941772;7	083612823;-262	4059814
125	9438477;8	385098267;-269	9701904
127	3148438;5	086138535;-273	3727783
125	5261963;9	004412079;-278	4751953
126	8525513;4	815693283;-280	9473145
124	9017334;8	397272491;-287	0550781
126	3137329;4	110852814;-289	6490479
123	815564;9	092047882;-296	1800781
125	6096924;3	069092369;-297	5521973
121	4157959;9	910102844;-303	9093262
123	3082764;5	560497284;-304	4188477
125	9734863;0	421288919;-305	7363281
121	0415283;13	03696899;-306	8293213
121	8623047;7	521205139;-310	1626953
123	8326416;2	699133682;-312	1008789
126	683374;-2	525642586;-313	5547363
122	1482178;14	98053589;-310	7772949
122	5385742;9	509436798;-314	3559326
123	1536499;3	444684219;-316	1128906
126	4175171;-2	352879906;-317	7348877
123	7377808;10	86635056;-317	3172363
124	0331177;5	223033142;-320	5022217
136	986084;8	88861084;-311	6809326
137	4584229;4	787267303;-311	8693359
135	0670654;8	348972321;-313	7683105
136	1482422;3	136743546;-313	8127197
133	935144;8	269146729;-315	9328857
133	3299438;5	52612648;-317	0661621
134	9838867;3	381390762;-315	0844727
130	4022217;15	09013214;-267	3710693
134	3928711;14	40619659;-270	4842529
130	3001221;15	0393219;-275	1153076
133	5102905;14	78244476;-279	0720459
137	0455566;13	05568542;-281	0807617
129	3989014;15	12690887;-284	4279053
134	0254395;14	07102814;-286	5279541
138	1721802;11	77234268;-289	2491943
127	5040405;16	00886078;-294	5891357
132	0921143;14	98901062;-295	2314453
137	1380371;12	40393295;-295	5959473
140	564978;9	104598999;-298	1049316
127	0402466;17	31141052;-299	3128906
140	2206421;5	617663574;-276	2013428
140	3762939;5	364629364;-283	4953613
136	2209839;2	211973381;-288	3631592
140	4655884;4	530063248;-291	1956299
136	0839966;1	368095875;-295	1672119
132	6212769;-0	565938568;-299	5270508
141	0201416;4	24575119;-296	5969971
138	3639771;0	615563154;-301	9118652
134	1673828;-2	27994957;-306	5863281
142	0606812;5	322924805;-302	6030518
125	9610229;1	88189888;-320	9983398
128	3713379;-2	864647865;-321	4958496
139	7224609;0	920420647;-307	2335449
134	6571167;-3	13843441;-311	2760498
135	1154175;-3	324272919;-316	078418
113	3881592;18	57671204;-11	19179382
109	5421997;18	94766235;-12	6444252
106	2755859;20	95281677;-14	24700165
114	356897;22	6492569;-13	84332123
109	9485596;22	6905426;-15	03300018
113	0779907;13	56313782;-7	492847443
100	60979;23	55325165;-21	98140869
121	0503174;25	93013611;-18	58591614
104	309729;8	673937225;-27	58148804
98	29185791;14	56942749;-21	19726868
99	95778809;23	54456024;-19	40517578
99	14709473;16	9674408;-16	94073639
107	243396;7	96917572;-18	95345612
110	0946655;10	64017029;-10	83552322
111	6775879;26	19298706;-18	57803802
106	4853271;25	57399902;-18	3739151
103	3511841;25	44850006;-19	87718506
118	8703613;12	94036102;-12	93395233
103	0478027;11	76323242;-17	62078857
115	8572021;27	03047791;-19	03699036
111	9187866;7	561854553;-16	64189758
109	7321411;26	47392883;-20	60116119
117	0571533;9	798291016;-15	8772171
120	5991211;22	46954803;-14	53910217
101	2282532;10	98333893;-21	63590088
119	7708374;25	98521729;-17	18065796
115	9710938;26	49614563;-16	81024628
115	5908936;9	623719788;-12	99205627
120	6544312;16	99464417;-11	66724472
112	6713257;7	182292938;-19	41238708
105	4049438;8	10922699;-22	54425354
99	89688721;12	27846451;-24	80382538
114	8690918;10	85206375;-9	85043869
107	1834106;10	39282761;-14	72626953
117	9083008;13	63589478;-9	7369133
98	61222534;19	92347412;-18	69798431
121	4397217;14	68453217;-15	24884644
99	07885742;19	02654266;-21	97735291
111	8083008;8	492233276;-13	08638153
109	961499;6	940538025;-22	71195221
122	5934937;19	41234436;-15	28404846
106	7231079;14	53603516;-227	8562256
101	253894;14	44772339;-287	6767578
113	1247314;1	156978703;-303	8685303
107	2411621;10	64779205;-309	974707
114	8527466;7	277057648;-305	0918213
101	0174622;21	07176819;-293	0269043
103	6890991;18	79980774;-300	5759033
106	4337891;13	9693222;-306	088916
113	844458;15	73414917;-301	1363525
114	3096069;18	07655029;-293	7829834
94	33150024;24	9023819;-6	280867386
106	5814575;18	00654602;-262	4786377
106	3480591;15	22595062;-246	9736084
106	0297607;15	23947601;-258	5265381
105	4043091;15	24699249;-266	5416748
104	8735962;14	53607788;-273	5611572
110	0755249;11	45152206;-247	3384277
110	4084473;10	45839691;-258	8356934
111	0691406;9	510060883;-267	1041748
111	209668;8	048924255;-274	8823486
100	8853088;20	05197906;-297	3275391
104	6006592;15	77665558;-304	1857666
111	2455444;14	49604797;-303	5476074
114	7519897;16	84633179;-297	8654053
105	9086914;20	30322723;-291	9715332
107	8062988;17	79860077;-300	9369629
92	31245728;25	22431946;-7	895520782
89	00789795;26	30996399;-10	11938858
88	05751343;29	13662415;-12	5486702
92	28289185;31	23858948;-12	7460228
97	49465942;31	99907532;-11	73012695
97	9694458;27	63786011;-7	038790894
111	4173584;6	681815338;-282	1528809
112	4715698;4	99997406;-289	030835
103	561731;14	43060913;-280	4312988
112	6560669;2	586204529;-296	0580811
110	8646362;19	31087952;-292	4987061
111	5055786;18	5602066;-295	5177246
105	563562;19	8256897;-295	297998
111	8317383;17	5507782;-299	0681641
106	2882202;19	1796051;-298	8086182
110	7346191;15	66324921;-302	5037354
106	0066162;17	10387268;-302	4578125
107	5741455;15	41081696;-303	8498047
108	2631836;12	8348999;-254	5532227
107	08573;13	7534729;-261	8077148
108	7396606;11	16193924;-264	1547363
106	1896484;13	71109467;-268	9035645
108	3746094;10	44736328;-270	2718262
105	9380615;12	5920723;-275	4467529
107	8659302;9	151457977;-277	1703369
104	2522583;12	46554413;-282	5
107	3516235;7	808721924;-283	7001709
101	5824036;12	59675446;-288	8527344
104	2208984;9	091434479;-289	6964844
107	5738403;4	806626892;-291	1999023
99	51871338;15	03659058;-292	3751709
101	0698181;10	56316071;-295	2775391
103	9108521;6	81781311;-297	4354248
107	7192993;2	813084984;-299	7128174
99	3411499;16	82932129;-296	8769775
100	4476624;12	78804626;-299	9612549
102	7963257;8	205268097;-301	4583008
106	4086914;3	958564377;-304	22229
101	9838562;14	6369751;-302	881958
103	2128784;10	88280106;-305	128125
115	9755615;14	3629776;-299	587207
116	8598877;11	13267365;-299	9653564
114	3788208;13	31379089;-300	9826416
115	9620361;9	223256683;-301	5225342
113	0789429;13	05594635;-302	5658203
112	4103271;10	91788559;-303	3917725
114	7896973;9	013289642;-302	1884766
107	7108154;18	91359711;-264	9404297
110	9989746;19	52724152;-268	1625
108	1058472;18	98359833;-269	8374268
110	6667725;19	45131226;-273	5498291
113	6215332;18	93981171;-275	8675781
107	5840332;18	58586578;-276	2933594
111	194165;19	46405792;-279	0136963
114	7879028;18	542453;-282	4179688
105	7694336;18	19544678;-284	271582
109	5484863;19	9878006;-286	4341797
114	0576172;18	92942352;-287	7543945
117	4895142;16	55208282;-289	8467529
104	7502686;19	6495224;-288	7529297
117	9993286;13	7411377;-271	3176514
118	0058594;13	82421265;-277	0553711
116	119397;10	56606827;-279	1915771
118	299292;13	28769379;-283	3937256
116	5709717;9	556798553;-284	929834
114	6431763;6	890988922;-287	4910156
118	8560547;12	84456482;-288	039209
118	078772;9	105522156;-291	2390869
115	4115356;5	534947586;-294	6296875
119	6010132;13	3677597;-292	8173096
104	1687988;8	967716217;-307	0520508
107	6103394;6	450032806;-308	4408203
118	7330811;9	167369843;-296	2585449
115	6961304;4	329956055;-299	4689697
115	5749268;4	079952621;-304	1239014
94	66192017;26	95293579;-8	055293274
92	44144287;26	9942749;-9	372135162
90	27463989;27	78829956;-11	00173416
95	38605347;29	97415466;-10	16548538
92	44255371;29	39454956;-11	23426971
96	20009155;22	67016449;-4	684717941
84	94042358;31	08531799;-20	74498291
99	94603271;31	85106812;-15	29711456
90	34672241;17	36341248;-19	73373871
83	9329834;21	16588898;-16	1642868
83	34526367;30	4873291;-17	06373749
85	24946289;23	59514771;-13	0909729
92	25478516;17	37358398;-12	60576248
94	26953735;19	87048035;-6	546902466
92	91157837;32	64511719;-14	85010376
89	071698;32	20142212;-15	31765137
86	21622314;32	62141418;-17	76929169
99	62866211;23	11886139;-9	312533569
88	55161133;19	77028503;-12	18517227
95	80008545;33	07787476;-15	70498199
95	81976929;17	85140533;-11	05798416
91	2989624;33	71719666;-17	4375061
98	55606689;20	9317337;-11	38124924
100	3755676;30	37326965;-11	28150558
86	90177612;18	33515472;-15	34674988
99	09884644;32	34805908;-13	95884705
96	27453003;32	55830078;-13	33459167
97	98464966;20	13647308;-8	844391632
100	289502;26	18664856;-8	739079285
96	19865112;18	26368103;-13	55181274
90	78156128;16	91476593;-15	42895203
85	53572388;19	49682617;-18	91852722
97	67217407;20	65597076;-6	356090927
92	07779541;19	3548111;-9	543071747
98	98162842;23	14823608;-6	855930328
84	23190918;26	28621216;-15	33383789
100	7550049;25	10211792;-11	80738831
84	35962524;25	95110779;-18	41381531
95	81606445;18	28379059;-8	164759827
94	23746338;17	92532654;-15	8383667
101	2313293;28	23315735;-12	19767609
74	9307251;21	84683075;-258	3391602
63	6624939;23	99461517;-306	5386475
79	18209839;10	89025879;-321	983374
75	43327637;13	92803955;-330	4541992
80	24416504;17	45256653;-322	9879639
65	82541504;29	31907654;-309	4873535
67	66408081;28	17073669;-318	6456055
69	41902466;23	64938812;-327	082666
78	68418579;28	49076843;-316	9211914
77	95720825;28	92600098;-311	3575684
81	35937608;32	5729586;-17	10815829
75	98612061;28	56117859;-272	4332275
73	97736206;22	13928223;-268	5799805
72	99474487;22	48295593;-276	9689697
71	35377197;22	47528687;-284	516748
70	25043335;21	82735291;-291	8606445
76	06696777;18	99979858;-269	5733887
76	65386353;17	86919861;-278	0008057
76	95775146;16	7953949;-286	0411865
76	96037598;16	07240601;-293	7297607
65	22454224;28	97041016;-314	8192871
67	35731812;25	43794708;-324	3332275
75	71875;24	76285553;-322	0250244
78	53665161;28	88869324;-314	5251465
69	75812988;29	87843323;-308	5949951
71	83822632;28	49935303;-317	8775635
77	028479;31	60354919;-18	81994019
73	32185059;30	80103455;-19	7235199
72	87538452;34	37701111;-21	6355835
74	77802124;37	21811218;-22	88531494
78	13929443;37	85809631;-21	84326324
81	16193848;35	52920532;-19	69531708
76	35043945;14	73444214;-301	0935303
76	96890869;13	26302032;-307	6833496
67	73132935;22	08827515;-299	0985352
77	67837524;11	68272476;-314	453833
74	60466919;29	36920471;-308	7053955
75	26118164;29	09086304;-312	1404785
69	82913208;29	83930359;-311	8125244
75	97682495;28	92287292;-315	2812012
70	47301025;29	41397095;-315	5458252
75	0098999;27	26092529;-320	2822754
69	60078735;27	45852661;-321	0390137
70	89182129;25	83301697;-323	1586182
74	61242065;20	0048584;-274	2104492
73	28850708;20	85316925;-280	0538818
74	75084229;18	30373383;-282	7673096
71	78067627;20	94629822;-286	9904297
74	01132202;17	7945343;-289	0483398
70	93884277;19	99712067;-294	1666504
72	99926758;16	87671509;-296	2212891
68	04691162;20	62612762;-301	4683105
71	87947998;15	99858093;-302	7459717
64	44570923;21	36230164;-307	7889404
67	90952759;17	37727051;-308	7063477
72	23197632;12	93113708;-310	3751465
62	84278564;23	11706848;-311	0644043
65	03116455;18	18179169;-314	6466797
68	47750854;14	3587326;-316	9276611
73	20120239;10	67560654;-318	8727539
62	97846069;24	89799805;-315	4119141
64	45186157;20	42615814;-319	3403076
67	2835144;15	38551788;-321	3834717
72	72565918;11	16573181;-323	8149414
65	64407349;22	91094513;-322	4574219
67	15593872;18	38936615;-326	1128418
80	6326355;26	47015076;-315	9005127
81	54968872;22	21405792;-315	9542236
79	67740479;25	26855774;-318	0537109
80	96347656;20	1493454;-318	0259277
77	68796387;24	19339294;-319	9800537
76	88424683;21	01847534;-321	2445313
79	76930542;19	78558807;-319	2313477
74	66759644;28	59135132;-277	5504395
77	66368408;28	51366577;-280	3036621
73	98256226;27	89332581;-284	1936523
75	85100098;29	43305969;-287	7891113
78	44129028;28	49134521;-289	535791
72	07098389;27	93839111;-292	1268311
75	56272583;29	01971436;-294	431543
79	39554443;28	1598999;-297	0943115
69	13939209;27	98447876;-300	8425537
73	17723389;29	06383972;-302	2539307
78	234198;28	93461914;-303	0768311
82	1338501;27	73392334;-305	2314697
67	95721436;29	35531311;-305	2562744
84	77022705;23	36341248;-285	7220215
83	98103027;23	46213531;-292	1423096
81	43190918;19	67226868;-295	8677979
83	415271;23	11475677;-299	0066895
81	27831421;18	70676727;-301	8602051
79	33848267;15	45653839;-305	313916
83	46375122;23	25160217;-303	8251953
82	56679077;19	0006958;-307	963623
80	62697144;14	61839142;-311	9158691
84	02250366;24	19183807;-308	8139648
70	3131958;15	25195465;-327	6371582
75	22486572;11	71270447;-328	4576416
83	42443237;19	53828583;-312	3748291
81	28473511;14	20133667;-316	4966553
81	65560913;13	98214722;-321	5370117
78	78919067;34	21350403;-19	01295929
76	359729;33	42779236;-19	55002289
74	31133423;33	56054382;-20	09983521
77	48571777;36	59186707;-20	06655884
75	30169678;35	81733093;-20	30343933
81	13888131;26	46535494;-11	6578169
67	60377808;33	28417358;-36	10648499
81	24265747;38	49796143;-32	07541199
70	85558472;22	43948364;-29	93210144
68	6768262;26	06353577;-26	45969015
68	10324531;33	67185572;-29	39385354
69	86008254;28	06455922;-22	34063089
75	62037035;22	58634075;-23	18843741
78	98402165;24	78967829;-15	79797241
74	75902096;38	30433496;-26	8188717
72	20371149;36	83959258;-27	12493237
69	48485734;36	15663231;-31	0347404
83	73389332;30	0294237;-22	05014047
72	73850536;24	9670893;-22	26797468
76	86927387;39	61143156;-29	29830239
79	31315742;23	34382675;-22	13122274
73	12259912;38	25676621;-31	1778025
82	34731008;26	93290079;-23	90141021
81	48981514;36	86277037;-24	76574176
70	58450287;23	54479851;-25	35892069
80	08033188;39	02396434;-28	22620927
77	34875849;38	41416561;-25	1770238
82	05150635;26	28624701;-20	23690241
83	78057602;33	70679772;-21	85637282
79	10568991;23	6143948;-25	33033447
73	37822633;22	06124692;-25	88507855
68	8471862;24	5059792;-29	27653542
82	13658799;26	43950859;-16	29460288
76	18906476;24	41827864;-19	46755083
83	50918021;30	55983324;-18	74740427
68	95926923;30	41457969;-25	90131403
83	90391696;31	94120859;-25	71898452
68	38520128;29	68966304;-30	55980694
79	95958676;23	57240355;-18	31337442
76	63734112;22	37113651;-27	42437921
83	74301554;35	20574415;-26	57538471
116	9558838;8	199740601;-256	8911133
107	4329102;2	554374886;-304	5100586
127	3362183;-1	569853687;-329	0376221
118	4264038;-1	118785191;-334	9400879
123	0891235;9	568595123;-326	5810059
101	8585022;5	189669418;-315	9766113
103	2009155;4	486825943;-323	38396
110	0013062;2	928133583;-330	3315918
117	084436;11	2887886;-322	8298096
116	1148071;14	65147552;-318	0868408
97	96025391;22	72132874;-5	948098373
112	5231689;11	85666962;-279	6917969
115	4165161;7	758981323;-269	6850586
114	0626709;7	511846161;-279	0602051
112	5955811;6	667848206;-286	6365479
111	6375488;5	252811432;-293	2835938
120	626001;7	575930786;-270	511792
121	2134766;6	493044281;-280	7095215
121	0342163;5	135737228;-289	0010742
121	1800537;3	606140137;-296	8691406
101	6165405;4	326774979;-319	6479736
106	4131714;1	447221184;-327	094458
116	0394043;8	264893341;-326	9595703
116	7932129;13	68579254;-321	0350098
106	5308716;10	53194427;-313	565332
108	8863281;7	902457428;-323	7611816
95	79775391;19	30790253;-9	39585495
92	55481567;15	72585449;-11	11455078
87	75342407;16	97324524;-13	540448
88	7434021;23	8631546;-14	66196899
92	45740967;28	40574951;-12	99676514
96	6984436;27	77764282;-9	4245224
122	5830688;2	679978371;-304	4477539
124	2362915;1	038711071;-312	1010498
110	7532715;3	574271011;-299	2291016
125	6761719;-0	829884529;-320	2009277
112	7099365;13	17473907;-314	7458984
113	012085;12	47911835;-318	4741943
106	0253906;9	162773895;-317	9378418
113	7713501;11	14960861;-321	4797852
106	6652588;8	097995758;-321	5514648
113	6611084;8	999848938;-325	6269043
107	0381592;5	145397949;-325	6476807
109	9408691;5	544368362;-327	6339111
117	8385376;6	621628571;-276	1611328
115	5749268;6	327353287;-282	5196045
118	569104;5	31456337;-285	484375
113	9570801;5	597767639;-289	2445068
117	8003296;4	300086594;-291	4971191
113	9283203;3	846248627;-295	4977051
117	9483154;2	80414238;-298	230127
112	3293823;2	464011765;-301	3373779
118	3927002;1	019186687;-304	5858887
109	2400879;0	726551533;-307	151416
114	2178223;-0	211774063;-310	0456543
120	078418;-1	693978882;-313	5472168
105	6793213;0	208283949;-312	2531006
110	4769409;-2	183895302;-316	3115479
115	6371216;-2	880801582;-319	700293
121	7155762;-3	86149826;-323	3727539
103	7903198;0	731510925;-318	3539063
108	1870972;-1	460467434;-321	4913086
113	7478882;-3	197618103;-323	8993652
120	3632935;-4	442243958;-327	9771973
107	1028931;-0	191515899;-324	8475098
111	3378906;-2	160298538;-328	2756104
119	0943237;12	54771805;-322	544751
121	2737915;11	01412201;-324	0215088
118	3993042;10	1829216;-323	312793
122	1195068;9	763965607;-325	0295898
117	6258911;9	007620239;-325	0140625
117	7330078;7	770253754;-325	544751
121	924292;9	283914948;-324	8457275
112	4454224;12	76144943;-283	4734131
114	9415039;15	74128723;-287	1829346
112	705188;12	07587128;-289	1213867
113	3661133;15	23404846;-293	3917236
116	1515259;18	32530975;-296	4154297
111	9934326;11	11547394;-295	9408691
114	1301147;15	19893341;-299	3354736
117	7114014;19	00756226;-303	813501
109	2368042;9	378800964;-303	3157715
112	1917236;13	56431427;-307	2079346
115	9981445;18	31646423;-310	1439453
121	1513306;19	37749329;-313	6910645
106	9401855;9	134160614;-308	7922119
124	5756592;17	23712006;-293	076123
124	8051025;16	73292694;-299	1825928
126	5582031;10	00498352;-301	4195313
125	6668701;16	34398651;-306	2978027
126	896521;9	355499268;-307	9237793
125	6230835;5	098571014;-310	8624512
125	9041382;16	40915833;-312	0781738
128	1775757;10	76637268;-315	8345459
126	5269409;4	775779343;-319	2126465
125	3775879;17	22383118;-317	8221436
115	1490234;-2	653000069;-330	4601807
120	7861694;-3	680771637;-333	3831055
127	4767212;12	09948959;-321	4817139
127	0480835;4	349359131;-324	1924805
126	90177;4	922426605;-328	4635742
95	44352417;23	63307343;-9	628813934
93	55278931;20	79566498;-11	01997223
90	80300903;18	73361206;-12	14156876
92	50367432;25	6638092;-11	57627106
90	48687744;22	47584381;-12	52499542
101	1765625;19	63318787;-3	143536377
87	55256348;15	15425873;-23	75392609
98	99547729;31	65299072;-21	03393402
103	5286255;10	06938553;-19	9868866
96	01745149;7	795705721;-15	95986469
86	23550058;13	95924818;-18	50160667
93	65007653;9	214342861;-12	51685142
104	9001709;13	19026489;-15	76804657
104	41604;14	17576752;-7	092215729
88	06521606;25	97041626;-17	31519012
86	37972412;21	18801117;-17	63072205
85	16806991;18	35888951;-20	14771936
101	6901245;27	17638245;-12	60329514
101	1021179;8	260944366;-13	04116058
90	27297363;29	73973999;-18	8726532
105	2195801;17	57575073;-15	13772125
86	29753418;25	18442383;-20	53149109
103	8820801;24	51761322;-15	77474365
95	98238525;30	63649902;-15	03282928
100	8934875;8	039412689;-15	65806732
94	86312256;31	83867493;-17	78538208
90	86410522;28	93149719;-15	38954163
104	3534058;21	67947235;-11	80018158
99	05377808;29	19725647;-12	13179932
105	1550903;20	55600281;-18	68709564
104	7593506;11	81425858;-17	78761444
98	75951553;8	242689379;-18	6523422
103	8492676;20	40404205;-7	247600555
104	0264526;11	45910492;-11	36652451
101	3744751;25	87875977;-8	429380798
90	26389565;11	2147955;-15	69727185
100	1842224;30	83085632;-16	25948486
91	66430767;11	5980135;-19	54044389
105	2710815;15	57229156;-11	10030975
105	0714844;20	24249115;-21	49674225
97	9142334;31	48510437;-16	95259552
85	30187988;19	95052032;-241	6042969
76	61595459;12	64740753;-298	5869385
89	25608521;21	69777069;-315	028418
83	84191284;16	66196289;-319	5852295
84	75;24	44954834;-313	4527832
74	04416504;16	15573883;-300	7735596
73	85626831;12	1247406;-306	779248
79	04907837;15	43709106;-317	8534668
76	28829346;25	93296814;-309	1368896
76	05186157;26	19838562;-303	5595459
100	7436096;28	92389526;-28	18919067
78	41329346;22	64067688;-265	3212402
83	94432983;19	36908417;-255	387793
82	74051514;18	72110291;-265	6164063
81	43738403;17	59138794;-274	3036621
80	76646729;16	32067413;-282	4561035
89	04029541;22	45806274;-256	5194092
89	26325684;23	00628204;-267	7470459
89	15385742;22	67042999;-277	4507324
89	24188232;21	75680542;-286	3692139
73	59269409;13	32203979;-303	6615967
75	99812012;13	52751465;-313	3181641
78	61969604;22	47010803;-313	4527832
75	74243164;26	13640442;-306	7361816
75	00182495;19	45719299;-299	4539551
74	39691162;18	97914886;-308	1118652
102	8098877;23	21212769;-28	69635315
100	9035034;18	61924133;-31	15283813
95	9786438;18	59607697;-33	29091492
94	06982422;24	33679352;-33	55009766
95	43204956;29	11570129;-32	20672302
98	40657959;30	5305603;-29	69716797
89	8632019;20	41670532;-294	2317383
90	09547119;20	20700531;-301	2124023
79	73769531;14	87454681;-290	5199951
89	67696533;20	76011353;-307	7567627
75	70731812;23	52635803;-300	6696289
75	36138916;23	58092499;-303	8559082
74	56384888;18	80010986;-302	5499756
75	30204468;23	69794464;-306	9628418
74	10784302;18	02846375;-305	5972168
76	58019409;22	15487061;-311	4910156
74	81029053;15	89464264;-310	5330811
76	67073975;17	66108551;-313	7450195
86	54589233;20	62572021;-262	5870117
84	63322754;19	00905304;-269	6072021
87	3633606;20	61216888;-273	2557617
83	06986084;17	64106598;-277	5077393
86	86083984;19	58894348;-280	3693604
83	2083313;16	5786377;-285	4022461
86	89614258;18	2547226;-288	3914551
81	64564819;14	22161102;-293	1964844
87	08485718;16	68288269;-295	5289795
79	43895264;11	73606186;-299	5624512
84	23095093;13	32385559;-300	939624
88	38228149;16	26805878;-303	291333
77	95236816;11	5209343;-301	7966553
82	10689697;11	7996666;-305	3156738
85	51118774;13	30715332;-308	2828857
88	57579346;16	5187561;-311	1113281
76	5387207;10	98671875;-304	4301514
79	72327271;10	95364761;-308	7372314
84	00980225;12	05585251;-311	9112061
87	47061157;15	52469482;-315	0037109
77	73314209;11	19635849;-311	4638672
81	64031372;12	19720383;-315	8915283
77	96882935;27	69291382;-308	8799316
81	62590332;27	49638062;-309	2233398
78	95429077;26	29390259;-310	4701416
83	41669312;26	18424072;-310	3745361
79	39414063;24	61144257;-312	1693604
81	76089478;23	29120941;-313	0363037
83	56044922;25	24290009;-311	1530029
77	89116211;22	31877136;-269	304541
78	2006958;25	58368683;-273	0536621
77	38132324;21	75634308;-275	8024414
76	66807251;24	43443451;-280	1041748
77	29647217;27	57294617;-282	930835
76	47417603;20	54391937;-283	9328125
76	18468628;24	62023773;-287	0025635
77	60651855;28	42653503;-290	7813232
75	63364258;18	57308655;-292	9125977
75	7307373;22	94162292;-294	8205811
76	76299438;27	2503418;-296	2966797
78	18991089;30	17331848;-298	9971436
75	06966553;18	20688019;-297	1611572
84	38724976;30	69280396;-279	4279297
83	78845825;30	69345703;-286	2030273
87	36595459;27	82463989;-289	9973389
83	63778687;30	46764221;-293	3845459
86	86594238;26	5170105;-296	0884521
88	73735962;23	12112732;-299	1245117
82	56497192;29	79656067;-298	0857422
85	26515503;27	32648621;-302	1377197
87	71751709;24	05611115;-305	5856445
80	94818726;30	38018799;-302	8472412
83	86419678;13	45479584;-317	6824219
86	54752197;16	48348083;-318	5758545
83	97295532;28	27932129;-306	432959
87	5980896;24	5962265;-310	010083
87	25067139;24	39647369;-313	8825439
99	48712158;26	88237;-29	41773682
100	0397583;23	46337738;-30	23746033
98	46109009;20	79419098;-31	816745
96	72602539;27	08947449;-31	14663086
96	68393555;23	81188049;-32	12693481
105	9665405;27	54718323;-27	24109497
92	13043213;18	23608398;-39	68167725
97	2453064;33	9659729;-38	16404114
108	5474976;15	63912048;-41	94381714
103	2404053;12	29580841;-36	48912964
93	76934814;16	46051025;-36	7794342
101	8401428;13	17867126;-32	78087158
110	3884644;19	32458344;-35	20831909
109	1592285;23	91614532;-29	10214844
92	79874878;25	72565002;-35	4076416
92	7385376;21	8411911;-35	67022095
91	81374512;19	74591827;-37	46147461
104	5626343;31	10576172;-32	54567261
107	4300659;15	87664185;-33	41192932
93	11625366;29	1637085;-36	66112366
110	9647339;23	84685822;-34	19299927
91	78262329;24	69202728;-37	83930664
107	5377075;28	21569214;-34	66852722
97	25693359;32	49759216;-33	346875
107	4500977;13	51139984;-36	57815552
95	52488403;32	26661377;-35	72884216
94	16879272;28	7575531;-34	14431763
108	4163818;27	9881897;-32	05270691
100	7693115;32	79148254;-31	77096558
110	6007568;24	03207245;-36	82848816
109	9862793;17	02566528;-37	85853577
104	8997681;12	54356308;-39	80599976
107	9695801;28	75935059;-29	49581909
109	0574585;20	22397919;-31	61580811
103	7470093;31	2258606;-30	09175415
98	11867065;13	90519714;-35	19542542
102	5531738;31	89517822;-34	92851257
97	87626953;14	3772583;-38	18388672
110	7945557;24	7696579;-31	34595032
110	5921875;21	28813324;-39	18633423
99	40987549;33	34344177;-35	0283844
99	30231323;15	10538788;-257	3566406
94	95530396;17	96046295;-313	6294189
109	5557617;-3	736910629;-325	1132813
107	8077271;1	688258171;-335	8946045
114	753418;5	712496567;-327	4371094
100	2343872;21	51117096;-314	6290283
98	37559814;20	76191406;-321	8007813
101	7555115;12	29275742;-333	3312988
111	6259399;16	17577209;-321	6903809
113	1823853;17	15448761;-314	7038086
96	22782593;22	94096985;-4	299525452
103	2891479;19	90799866;-272	362793
99	79896851;15	33084564;-267	9704102
99	77355347;15	15318909;-277	309375
99	48185425;15	04421844;-286	0494629
98	91807861;14	05209351;-294	9189941
102	491626;11	2698082;-268	6313965
104	5421387;9	148648071;-278	3996582
105	4487183;7	27494812;-287	8043457
106	2857666;5	765802383;-296	8330078
97	9965271;21	47382202;-318	4661133
98	61021118;16	26107483;-328	8048584
107	8592041;14	41339264;-326	7507813
113	4692505;16	40150909;-318	6018066
104	0113403;20	53908691;-313	750415
104	4739868;19	27857361;-322	4397461
89	7935791;22	07787628;-6	704763794
84	04672852;22	20690155;-9	576033783
82	68175049;27	33947449;-11	53803864
88	13967896;31	53305969;-12	81979523
94	97763672;32	13903809;-10	47507858
98	7545105;27	45250549;-7	088297272
107	3783569;3	682817459;-305	142749
108	1730347;1	342382431;-312	0975342
97	73900757;13	78009033;-304	1651123
108	8171509;-1	083668232;-318	6991455
109	0776733;18	73079529;-313	620874
109	9557129;18	39454498;-316	5677002
103	7717773;20	17955627;-316	5178711
109	6818237;17	79229584;-319	9003174
103	4696655;20	23886719;-319	7894775
107	4721069;16	46768188;-324	9595459
101	2947266;18	51822662;-325	2394043
102	9166992;15	71274567;-328	162207
101	4936279;12	3351181;-274	1269775
100	8294617;12	99952545;-280	9511475
103	0064941;9	801974487;-284	1594238
100	0977356;12	94117584;-289	0933838
102	846582;8	949780273;-291	5666748
99	94064941;11	36666718;-297	7560791
102	6177734;7	387752533;-300	1513672
97	89012451;12	08546295;-306	8417236
102	039032;5	925321198;-307	5647949
94	49923706;14	05961761;-314	0615723
98	1302002;8	452519989;-314	2831787
102	4539673;2	32591095;-315	219751
93	97571411;16	17464905;-316	7009277
95	53226318;10	05206757;-319	826709
99	1203064;4	92695694;-321	844751
103	5139526;-0	838480282;-323	2646729
94	755896;17	94485321;-319	8542236
95	49679565;12	55314026;-323	9570068
98	24862671;6	090975571;-326	2907471
103	2450073;-0	744121933;-328	3563721
96	26447754;14	47453156;-327	0239014
98	32722168;8	332523346;-331	4661377
114	8891968;14	05650177;-320	5015625
116	3741577;10	14901428;-321	246582
112	5489624;13	31461792;-322	5594971
115	0319824;8	411263275;-322	915332
110	1778564;13	29760895;-324	5588867
108	9471558;11	00789185;-325	582959
113	429541;8	156969452;-323	2710938
103	2000854;20	06188354;-278	1521973
107	0841309;19	46815033;-281	1163574
103	302417;19	96744385;-285	6292969
106	7124878;20	6496109;-289	5001465
110	3182129;20	0661087;-291	7900146
102	9771362;19	376297;-295	1102051
107	2634644;20	96110992;-297	473877
112	2440796;19	11246796;-300	4388916
101	4782654;19	82851257;-305	9864502
106	6519409;20	17263336;-306	8834473
111	7359497;18	1693573;-307	0490967
115	6953613;15	56212463;-308	9537842
101	6218994;20	84589844;-310	9630615
114	9860107;12	75156021;-286	8793457
115	2480835;12	68304062;-294	2065186
112	9091187;7	82562027;-298	8153809
115	7745483;11	40961838;-302	1512451
113	6095581;6	432740021;-305	6075439
111	1611938;3	337168121;-309	5930908
116	4631958;10	7954071;-307	4104248
115	7062012;6	067684937;-312	0625488
112	8506592;1	719544792;-316	2351318
117	5972412;11	4714859;-312	7868408
101	6390869;4	163115311;-333	0772217
106	632373;-1	34556675;-333	7537842
117	2291138;6	74591217;-316	9179688
113	5501465;0	663561678;-320	5490967
114	3626099;0	435629702;-325	4565186
93	75964355;25	43059692;-7	288677216
89	26739502;24	80565643;-8	468416595
85	59661255;25	65267334;-9	933892822
92	97385254;29	5106842;-9	356705475
88	48896484;28	70015564;-10	38522644
96	68651733;18	77953491;-2	63937645
80	39798028;27	77995346;-20	29964124
98	88086548;33	39535828;-18	29341125
83	11676025;13	47572174;-20	49883728
79	07079468;16	84748535;-15	029953
78	75354596;27	68298021;-16	21992714
79	27207642;19	61786652;-11	64343643
89	02348633;12	82626648;-14	21041565
93	55448608;14	56482544;-6	439344788
89	09204244;33	16849839;-15	24872248
84	60163551;31	31799078;-15	25251438
81	63444128;30	91050251;-17	42416366
100	3136902;21	43578186;-10	65283432
84	11065674;15	49391785;-12	54948425
92	89424525;34	78512646;-16	67376785
94	44753418;12	37319183;-13	0130127
87	33871801;33	41611728;-18	16987581
98	50855103;17	34147186;-13	46187592
99	35212402;30	40678101;-12	28677444
82	2175354;14	63192444;-15	44482727
97	36657715;33	43848572;-15	44245758
93	36951294;33	03540039;-13	6099762
98	97104492;16	30729065;-10	42421494
101	5518188;25	5344986;-9	471077728
94	22991333;13	3494278;-15	85617828
86	37877808;12	58405685;-16	67975311
81	93121338;18	04462433;-18	52708435
99	76356812;17	35920868;-6	931804657
89	67824707;14	80214081;-10	49845581
100	2338318;21	49419708;-7	106064606
78	57164255;22	97362093;-14	12107822
101	5518005;23	72068939;-13	82628632
79	2779541;22	63672028;-17	88465576
95	25396729;12	24231949;-9	158602905
90	77071533;13	13384247;-18	01710052
101	6807068;27	88062439;-14	04045868
77	19192505;25	42982941;-261	7711426
72	65351563;31	68212585;-318	0472656
73	87014771;11	93399887;-333	1368164
73	74363403;17	4517807;-340	8526611
80	44604492;17	64994965;-334	8702148
77	16091919;33	90230713;-323	1471436
74	30293579;33	70919189;-329	617334
73	49012451;25	39507904;-339	8836426
84	94046021;25	05024872;-331	8509766
87	24794922;25	91553345;-326	2073486
92	08009033;23	6957077;-30	55540466
82	4979126;30	4916687;-278	0342285
76	9375;25	6883606;-272	3926514
76	66556396;26	35779114;-281	7273682
76	1684082;27	06591797;-290	7786133
75	00441895;27	60709229;-299	5861816
77	57091675;21	78525238;-273	0592529
78	52315063;19	2000946;-283	0536621
77	97633667;18	34335022;-293	1328857
77	14384766;17	62507324;-302	4155273
74	57022095;34	2921936;-326	2784668
72	5263916;29	29766541;-335	101001
80	40071411;24	50375671;-335	4456055
86	59124756;25	3860672;-329	3589355
80	77908936;31	53226624;-323	1929688
79	76038208;30	12542114;-331	1597412
88	13838501;25	87328491;-32	13968811
84	20303345;29	79950867;-33	91858826
85	57664185;34	67270203;-35	58631592
91	71383667;33	45342102;-36	88863525
96	04612427;30	23218384;-35	4859436
95	63494873;25	81966858;-32	4886322
75	43516235;17	44684753;-311	3875244
74	54471436;15	56454926;-319	2694092
75	26859131;29	35809021;-308	4939697
73	66555786;14	04829712;-326	2623047
84	5869873;28	45037537;-324	15354
84	63574219;28	05016785;-327	2197021
80	09032593;31	81712341;-325	9450195
83	99328613;27	4971283;-330	0779297
79	35773315;31	63437805;-328	8183838
81	12610474;26	4651947;-333	9686279
76	40864258;30	50160217;-333	2046143
76	70750122;27	63276978;-336	1053223
76	89835815;23	15166473;-278	555957
76	48240356;24	34576721;-285	5493164
76	74905396;20	9342041;-289	0014893
75	57412109;25	46121063;-294	0021729
75	9723877;21	21135406;-296	5704102
74	56251831;25	33901062;-302	3901855
74	97416382;21	28380585;-305	1983154
73	31408691;27	61023254;-311	3375488
73	32739258;21	17093658;-313	3553955
70	89195557;29	30988464;-319	1036377
70	77905884;24	27866821;-320	1046143
71	93058472;18	81924896;-322	0043945
70	50939941;31	05598755;-322	4627441
68	9137146;26	37850037;-325	52229
69	8425354;21	76842957;-327	8707275
71	20879517;16	40079803;-329	9091797
71	07134399;32	32844849;-326	3788574
69	24866943;28	04819946;-329	781665
69	20137329;22	67284546;-331	8975586
70	74000854;16	72554016;-334	1799316
70	59281616;28	8437439;-332	8474854
69	5388855;23	96962891;-336	7428955
85	99995728;22	61074219;-330	5785645
84	57319946;19	23352814;-330	5321289
83	82471924;22	52814484;-331	9687988
82	77142944;18	48729401;-331	870166
81	87595825;22	95703125;-333	632666
79	7788208;21	65442505;-334	0305176
81	61109619;19	07470703;-332	5173584
82	33364868;30	5052002;-283	93396
85	34279785;28	57852173;-287	8444824
81	86885376;30	25373535;-291	8204346
84	36924438;29	02533264;-296	5549805
86	72990723;26	72714539;-299	5826172
80	91253052;30	35348206;-301	3514648
84	85551147;28	728125;-304	6304199
88	14414673;25	8453064;-309	1784912
79	72641602;30	9831543;-312	5827148
83	98106689;29	45157471;-315	5206787
87	69904785;26	42382507;-317	0782959
89	90621948;23	04141083;-319	7493164
79	4569519;31	96959229;-318	8836426
87	53374634;19	2763382;-294	7051758
87	2197876;19	46133423;-302	4816162
83	17003174;17	01082611;-306	4802002
87	12834473;19	05735321;-311	2114014
82	47485352;16	32171021;-313	949292
78	21066284;15	06761169;-317	2841309
87	32064819;18	92536621;-317	3835693
83	54356079;15	70805817;-321	6319092
78	15878906;14	76627197;-324	745752
88	271875;19	37570953;-323	4501953
70	78412476;20	49981537;-337	9271973
72	25789185;15	70570374;-338	676709
84	39659424;16	05124207;-326	607666
78	41934814;13	50054626;-329	1925049
78	51190796;13	58917389;-333	6121582
91	87523804;26	70492249;-32	55451355
89	03899536;28	51485901;-33	18226318
86	9881897;31	41922913;-34	30796814
93	4550354;29	70075073;-34	29868164
90	39543457;31	58660889;-34	87476807
89	41226196;18	8785965;-28	71925049
85	05133667;36	89349976;-43	53840027
100	4922852;26	51266785;-42	95928955
76	90769043;23	06843719;-42	50003052
76	75592651;29	01756897;-37	92678833
83	16239827;37	39942098;-39	7244218
78	85238037;30	21309204;-35	00125122
80	91835327;19	37444763;-36	44689026
85	68780518;18	6879425;-30	8661438
93	66018447;34	44269291;-39	05223737
89	43403475;36	12714563;-39	05072518
87	30798652;37	96377731;-41	0077791
93	44081421;20	25397034;-35	18708801
79	37946777;23	98523254;-34	58395996
97	60223389;33	35871582;-40	42570496
85	16719971;17	14491272;-35	95584106
92	77321807;35	83696311;-41	79581137
90	3515625;18	27490234;-37	0444397
98	8123291;26	80884705;-36	69243774
76	16254883;24	37305908;-37	26552734
99	55993652;29	18929138;-39	81233215
96	42261963;32	05609436;-37	58877258
89	82852783;17	43144226;-34	32317505
96	70361328;22	75783386;-34	5125
85	14485474;17	29753113;-38	48252869
78	33563232;20	70148926;-38	57987671
76	54309692;26	95204163;-40	5152832
90	02243652;17	53612366;-31	39729919
83	03162231;20	75220337;-33	71490173
93	37092285;20	49803009;-32	44723816
80	17088623;33	7132782;-37	61299438
95	86616821;21	21673126;-37	99631348
79	79241333;33	54534912;-40	87913208
86	0375061;17	00843353;-33	03816528
82	00523071;18	19182434;-40	24215393
98	79549561;23	72150879;-38	3893158
74	81483154;23	70795746;-243	3730957
61	90533447;22	63161621;-297	2488525
77	27341919;13	0046463;-310	5016357
71	60680542;16	11517792;-317	0073486
76	75244141;20	95662994;-311	5383057
63	26654663;30	25822449;-298	7376221
63	20960083;29	8402771;-306	045752
65	9098877;23	1557312;-314	8608398
73	38827515;31	21635742;-306	2697998
75	5114563;31	56945496;-300	4739502
86	17459717;28	52662354;-18	9663269
73	34667358;30	37134705;-260	869165
73	16447754;24	22943726;-254	9178711
71	79998169;24	48163757;-264	4049561
70	60512695;24	22481079;-272	8848877
68	73944702;23	34485321;-281	0072998
77	26030884;21	52314453;-256	0780273
77	67418823;20	74535828;-266	2294434
77	18475952;20	04671021;-275	4103027
76	04440308;19	06626587;-283	8060303
61	65072632;29	9106842;-302	6176758
63	5479248;25	70018921;-311	411792
71	49818115;27	31127319;-311	0775146
75	16594238;31	53773193;-303	7541748
67	10216064;31	42970581;-297	1561523
67	50376587;30	56980896;-306	2533447
81	94315796;25	87079468;-20	2091568
77	67980347;25	95939331;-22	58962402
75	19593506;29	1174408;-24	78527985
80	43172607;33	49455566;-26	32540588
85	9953125;35	50109863;-24	34447021
88	50093994;31	99235535;-20	97227783
75	36890869;17	59963989;-291	640625
75	72352905;16	03418274;-298	1390625
66	10638428;22	91286774;-288	9682861
76	45094604;14	49887238;-304	3084229
72	13557739;31	74063416;-297	4415527
72	21367798;31	57731934;-301	0396484
66	66617432;31	16047974;-300	4367432
71	76218872;31	25858765;-304	2793457
66	50626221;31	13442078;-303	8356445
70	46528931;29	24359131;-309	0096436
65	33306274;28	92111511;-308	7552246
66	92474365;26	91565247;-311	2131836
74	72762451;22	29677124;-261	5471436
72	86912231;22	89507599;-268	202832
75	075354;20	82589417;-271	5897949
71	12711182;22	90631714;-275	9522217
73	75921631;20	338591;-278	5456543
69	82224731;21	79678345;-283	8383057
72	38850098;19	41995392;-286	4464844
66	69904175;21	25736847;-291	7756348
71	00245361;17	76937103;-293	2888428
63	09152222;20	98346863;-298	2721436
66	74414063;18	2331955;-298	9003662
71	33547974;15	37451324;-300	4669678
60	95823975;23	04019165;-300	4441162
63	26773682;18	80548706;-303	5621094
66	99641724;15	91241913;-305	7322998
71	98407593;13	34450684;-307	7193115
60	2203186;25	30653839;-303	5803467
62	11939087;21	13838348;-307	1211182
65	42751465;16	56548767;-309	2452881
70	89447021;13	1676239;-311	557251
62	59199829;23	48767395;-309	6616699
64	637677;18	80666809;-313	0999268
76	92554932;29	59706421;-305	8075195
79	03540649;25	9283905;-306	7012939
75	52373047;28	46100769;-307	717627
78	17805786;23	77522125;-307	9924805
73	77111206;27	25928955;-309	5227051
73	59091797;24	09787292;-310	2447998
76	7567749;23	30706024;-308	6975586
72	50067139;30	50324707;-266	0798828
75	28685913;31	55769348;-269	4590576
71	58562012;30	36259155;-273	1767578
73	35238037;31	92806702;-277	1804199
76	22835083;32	52909241;-279	5339844
70	03650513;29	43634338;-281	7182129
73	02459717;31	37130127;-284	2076416
76	78328247;32	05202637;-287	2598877
67	07876587;28	72969666;-290	8175781
70	99855347;31	08882446;-292	0152832
75	57942505;31	83002014;-292	786377
79	14592896;30	76200256;-295	1798828
65	90188599;29	87626953;-294	9031494
82	4135498;27	69628296;-275	6188721
81	54420166;27	66054688;-282	3306885
80	22511597;22	9533905;-286	4354248
81	184198;26	9290741;-289	3530273
79	97514038;21	92659302;-292	4220703
78	18710938;18	48804779;-295	9304199
81	09483643;26	73329773;-294	1071045
81	06928101;22	415271;-298	5236328
79	18109741;17	96989288;-302	3135498
81	45432129;27	83043518;-299	1278076
67	77831421;16	57288513;-314	3571533
72	20119629;13	49968109;-315	6406982
81	61235962;23	25526428;-303	0673584
79	66693726;17	3284729;-306	4388428
79	16645508;17	14392853;-310	5379639
84	60654907;29	72745056;-20	97898254
81	47055054;28	19779053;-22	04064484
78	44241333;28	33226929;-23	64357758
84	27558594;32	86705322;-23	34756012
80	84296875;31	10062256;-24	47700043
86	56546631;25	9635498;-17	54244995
71	48649902;29	07197571;-28	49563293
92	98531494;33	22030029;-31	09872742
81	29144287;16	46673584;-31	79152832
74	28535767;19	70571899;-27	056073
71	71604614;28	23808289;-27	3651123
74	46809692;22	32698059;-24	51265564
83	95675049;17	71128845;-25	89265442
85	60375977;21	87381744;-20	10197906
80	81621094;35	41152954;-27	68733521
76	82737427;32	10602112;-27	60629272
73	88876343;30	72852783;-28	54408875
91	48974609;26	3024353;-23	93482971
79	15478516;19	00830383;-24	35890656
84	75517578;37	2355072;-28	84486694
87	84848022;19	22091522;-24	9395874
78	92548218;34	87793579;-29	49437561
90	99136963;22	90527496;-25	79039917
90	6758728;33	82752686;-25	65079346
77	98783569;17	62001495;-27	1807373
89	84893188;35	86879883;-28	28462524
84	69146118;36	86470032;-26	37919922
90	24248657;22	63842621;-22	77563171
91	60379639;30	12432556;-23	316539
88	43901978;19	17390442;-27	51655884
82	38265381;16	76465607;-28	27243347
76	09338379;17	8999054;-29	51732178
89	55213623;23	84007568;-19	86455383
83	08840332;19	85046234;-22	68530731
90	46030273;27	12388916;-20	89547272
72	76826782;24	64338684;-26	17899475
92	581427;27	94936523;-26	82009277
72	55674438;23	86777344;-28	26385193
87	77952881;20	30973969;-22	08525543
86	41845703;17	90056305;-29	4827179
92	79639282;31	23747253;-27	34458618
69	14501343;24	74568024;-255	0563721
57	20612183;25	4490921;-308	4776123
69	25647583;11	42934799;-319	5253906
65	97115479;13	5303833;-329	1707031
72	04266357;19	61721649;-323	7021973
59	943927;30	55463257;-308	5423584
57	76538086;29	96233826;-316	6308105
60	5715332;21	06919861;-329	0463379
69	51925049;29	71349182;-319	8180664
71	88338623;29	99144592;-310	8059082
91	350177;28	0693634;-19	13822784
68	91813354;29	67354431;-278	5849365
67	78286743;25	23845825;-269	3243408
66	75793457;25	23408966;-279	1257813
65	45769043;25	23906708;-286	8540039
63	82896729;24	63250885;-293	8965576
70	32631226;21	27489471;-269	9853027
70	60215454;20	06268921;-279	9260498
70	6760498;19	29349976;-288	1394287
70	44052734;18	53311157;-295	6563232
57	45736694;30	40748291;-312	4827881
58	03010254;24	71563416;-323	0211182
66	203302;26	01095276;-323	2536621
72	37825317;29	6941803;-315	609668
63	87341309;30	82255859;-307	1325684
63	12024536;30	19840698;-318	3538086
85	20220947;25	80990601;-20	66055145
80	8519165;28	81217346;-22	86780396
80	48782959;32	51643982;-24	8722641
85	53265991;36	36889954;-26	97568665
91	35256958;35	32546692;-24	66518402
92	03026123;31	23623657;-21	16894226
69	4505127;17	1369278;-302	3169189
68	90076294;15	27559204;-307	920459
61	76068115;24	30608521;-301	045166
68	87867432;13	27812958;-313	6093262
68	5260376;30	50488281;-308	4374756
68	7017395;30	20359802;-312	1388184
63	06348877;30	82798767;-310	8021484
68	06618042;30	17533875;-316	5872314
62	31784058;30	76398315;-314	9604736
65	73561401;28	00452576;-321	6459229
60	38300781;28	05959778;-320	6875
61	81434326;25	87035828;-324	3245605
68	68022461;22	62145538;-275	9038086
67	33170776;23	55091553;-282	4308838
68	72337646;20	90585022;-285	0575439
65	72880859;23	66300812;-289	355957
67	90570068;20	55337372;-291	201123
64	67855225;22	60442505;-296	1611816
66	7934082;19	60337677;-298	0865479
61	87658691;22	84655762;-303	3431152
65	36737061;18	61851959;-304	1164795
57	80532837;23	03993835;-308	7581299
60	96599731;19	5219986;-308	9829102
64	75442505;15	94072876;-310	303418
56	67098999;24	67333527;-310	5802246
57	8482666;20	06495514;-313	3414063
60	48760986;16	34572754;-315	4771973
64	70484009;13	31601563;-317	3579102
56	08621216;26	40728149;-313	2098389
56	95734253;21	87448883;-317	2168457
59	48726807;16	99869995;-319	5809082
64	01815796;12	75398941;-321	7041992
57	11989746;23	31451874;-320	5294922
59	20930786;18	22438812;-324	9077637
73	16453247;27	58045044;-317	539917
74	33860474;24	06428986;-317	5392334
71	05880127;26	58587952;-319	7645996
73	27492676;22	47207794;-319	5626709
68	74417114;25	67335815;-321	5450928
68	14970093;22	63907623;-321	9502197
71	77669067;21	95670929;-320	3991455
68	74456177;29	9516571;-282	4393066
71	66040039;29	87795105;-285	2623779
68	07002563;29	89307251;-288	086499
70	25112915;30	55949402;-291	3794189
73	05904541;30	0770752;-293	2079102
66	54354248;29	43877869;-295	0206787
70	03244019;30	13427124;-296	9616211
73	65831299;29	85483093;-299	4493164
63	67772827;29	41979675;-302	6471924
67	79767456;30	53278503;-303	4395996
72	42689209;30	04538879;-304	1317383
75	96072388;28	73536987;-306	155127
62	65720215;30	09727478;-305	7704346
77	76282959;24	8397934;-289	1623291
77	26630859;25	08413544;-294	8680664
74	66270142;21	69442291;-298	0965088
76	87443237;24	79702606;-300	7895996
74	32711792;20	79052124;-303	1857178
71	90668945;17	39895935;-306	0116455
76	95704346;24	81508026;-304	8951904
75	37660522;20	84229431;-308	6771729
72	7651001;16	1964798;-311	8952637
77	63881226;25	60467834;-309	6142334
62	15859985;15	58096771;-326	1166748
65	92885132;12	06964417;-326	6984131
77	13569946;20	9994873;-313	3026855
72	89692993;15	63780975;-316	1370361
73	06350708;15	20078278;-320	9319824
88	8774231;29	70848083;-21	4552002
85	56964111;29	02290649;-22	82184753
82	82124023;30	70749817;-24	16592865
89	14428711;33	41488037;-23	74784393
85	66043701;33	13278503;-24	96186981
90	11400146;24	08250122;-18	15271454
74	60861206;33	1322937;-34	30062561
95	95090942;31	21145325;-29	14710388
76	42971191;19	61396484;-33	3296936
72	59124756;23	95912018;-28	63442993
74	28746948;33	13485107;-29	90137329
74	76048584;25	87055359;-25	12131653
82	55186768;18	29520721;-26	43704834
87	31349487;20	66097412;-20	55181427
86	4293457;37	17006836;-28	91260071
81	61802979;36	22080078;-29	05996399
77	50028687;36	16922607;-31	0526825
93	56881104;24	40197296;-22	98551941
78	34257813;21	04470367;-24	83796997
90	06855469;36	9932373;-29	39797363
87	60262451;17	46278381;-25	03506927
84	13330078;38	07457581;-31	27886658
91	63085327;20	74780731;-25	24728088
94	54033203;32	1146637;-25	01959839
75	20830688;20	49882965;-28	14942017
94	17744751;34	18151855;-27	54656372
90	40095825;36	21728516;-27	00200806
91	79265747;20	02203827;-22	589888
94	6791687;28	38171082;-22	68611145
87	29475708;17	89155731;-27	60393677
79	34445801;18	47373199;-29	03794861
73	29793701;22	34881744;-31	55124207
91	71726074;21	59367371;-20	08782654
83	6975769;20	0233902;-23	24810333
93	92307739;25	31129608;-20	55018616
73	47272339;29	23485413;-27	55482178
94	39501343;26	05030518;-25	6356781
72	58682861;28	60882568;-31	36367798
88	6194397;18	24564819;-22	38834534
83	90913086;17	87718048;-30	03405457
95	56850586;29	30782471;-25	97181396
74	48027344;19	36081543;-311	5580322
73	78649902;4	894141388;-362	0628662
81	05531006;23	56732483;-375	729834
79	58955688;19	56537933;-384	2135498
72	98639526;20	72116241;-380	384082
68	41276855;4	627968216;-366	0283691
70	12875366;5	11892128;-372	4027832
73	22775269;11	28829651;-380	2699707
64	98601074;16	88553162;-373	7807373
63	47579956;18	44616852;-365	6855957
76	47107544;32	3840332;-27	40403137
66	48737183;18	658078;-318	501709
73	96405029;17	97372131;-318	7008545
73	6255127;16	77619019;-326	8608398
73	31281738;14	85614471;-335	2512451
73	6550354;12	26629791;-343	8993164
76	36629028;21	90253906;-320	0126221
77	42651978;22	68515015;-328	9571289
78	23627319;23	19547272;-338	0539551
79	27670898;22	71744537;-346	8810547
68	94133911;4	470980453;-369	5881592
72	36609497;7	958937073;-376	9771484
69	22251587;15	51444244;-377	6629883
64	11278076;18	6319458;-370	130957
66	25991821;7	648508453;-362	6568604
67	49743652;10	3800621;-373	2659668
79	9720459;27	11386414;-29	00924377
79	77451782;20	84977722;-31	9072052
73	93560791;17	78457184;-34	56173096
69	19558716;24	22862244;-35	11070862
66	35934448;30	73887634;-32	13924561
71	5223999;33	55866089;-28	99265137
80	35671387;21	77323151;-355	5312744
81	16466064;21	12438202;-363	061792
74	00048218;9	147684479;-352	5726074
81	36259766;21	67691956;-369	7245605
64	49990234;14	22697754;-362	9306641
64	82619629;14	58344879;-367	1692139
66	62504883;8	067346954;-367	1201172
65	38439331;14	66240845;-371	2604004
66	93378906;8	634259033;-370	7806152
67	46466064;13	91910858;-376	0107178
69	36074829;8	688762665;-375	0824951
70	09922485;11	11924057;-377	4429688
75	57539063;19	81309967;-324	5212158
75	04454346;17	71807098;-330	6692383
76	92570801;20	45846252;-334	2449219
74	80088501;15	35027466;-338	4216309
77	21900024;19	30318756;-341	4373535
75	80324097;13	70515747;-346	8749512
78	58269043;17	65130463;-349	8308594
76	17642822;10	11046219;-355	6710205
80	01634521;16	10806427;-357	553418
76	38289795;6	252711105;-363	3699219
79	17094116;10	81075974;-364	1775879
81	41481323;16	34849396;-365	9341553
74	64185791;4	491677475;-366	4520752
78	36408691;8	162348938;-369	6524414
80	45348511;12	56752472;-371	7517822
82	55161133;17	79080963;-373	4937744
73	11687012;4	487720871;-370	0481934
76	71768799;7	136035919;-373	4143066
79	78681641;11	57320938;-375	4830566
82	43165283;17	34407196;-377	8647949
74	8180481;7	234366608;-375	7675293
78	68233032;10	44636307;-379	3801514
65	79597168;20	25084991;-372	2646973
68	48065796;22	39667664;-373	2085938
67	54760742;18	72239838;-374	5110107
70	53233032;21	92932129;-375	3452393
69	01392822;17	13790283;-376	2261719
71	70241699;17	63529816;-377	6213135
71	51605835;20	81985931;-376	5619141
66	06655884;17	69655609;-325	674292
65	31403198;20	97986603;-328	9690186
65	70637817;15	90459442;-333	8830078
64	5503418;18	30800629;-337	8994629
63	75337524;21	88505402;-340	3452393
66	18568726;13	15551147;-343	4823975
63	35720215;17	05689087;-345	7312988
62	43521118;22	26903534;-349	2914551
67	42217407;10	00888062;-354	3993164
63	96047363;14	03252563;-355	5697998
62	40606079;19	92021637;-356	3100586
62	97753296;24	64162445;-359	0048584
67	10183716;7	882619476;-359	7893066
68	40303955;30	73543701;-336	4014648
67	71801147;29	51057739;-343	9014893
73	08086548;27	58115234;-349	1427002
67	50847778;28	75265808;-352	1548096
73	72556152;26	82406921;-356	2580322
78	15536499;24	4447937;-360	4085449
67	21882935;28	28331299;-357	7825195
72	28928833;26	95598755;-363	3115723
77	18849487;24	38283844;-367	5398926
65	92050781;26	87193604;-363	7932617
79	91834717;14	27238007;-381	1766602
81	42689209;19	73193512;-382	5090576
70	53052368;26	87016602;-368	5757324
76	82711792;24	59557343;-372	1204346
76	39946899;24	28915253;-377	0921631
75	06160278;30	17341614;-29	89998474
76	95076294;26	36328125;-31	39452209
76	10718384;21	92447052;-33	10757751
70	39622192;29	06474609;-31	76705627
72	41130371;24	73076172;-33	1396698
79	61478882;33	21167297;-26	72937012
70	73881836;16	33274231;-39	11145325
66	14269409;37	1010437;-38	67439575
85	9586792;25	22782135;-42	08127747
83	23163452;17	6358429;-37	9148407
73	30925293;15	32296448;-37	55734253
81	73778076;17	6697937;-34	58053589
85	8776123;28	60162048;-36	35837402
82	91644897;31	36593933;-29	9382019
67	09251099;25	36826172;-36	88772583
69	74741821;20	71569061;-37	28474121
70	03930664;17	99113922;-38	70076294
76	33121948;36	31562195;-32	65205078
84	82356567;23	28748016;-34	81811218
64	25420532;29	21276245;-37	23303223
84	05206909;32	90856323;-35	29019775
66	77800293;23	62757874;-39	12122803
79	67824707;35	58588867;-35	36051025
67	4911499;35	42515869;-33	43248596
85	61069336;21	72749023;-37	89316406
64	65239868;34	4292572;-35	73649597
65	63563232;29	23869324;-34	38897095
80	95357666;35	68410645;-32	61864929
72	19382935;36	52747498;-31	3972229
83	68997192;33	24647217;-37	80624084
86	05305786;26	66897278;-38	75236816
84	44521484;19	60788879;-40	66416931
80	55718384;35	85714111;-29	527771
84	33466797;27	9727356;-32	96055908
76	6388855;36	07554932;-29	58779297
78	06322021;16	08587341;-36	51582336
73	27271729;37	05401611;-35	30018616
77	65878906;16	12646179;-39	13084106
83	54468384;33	23267212;-32	23955994
84	84586182;31	04290161;-39	89442139
69	36921997;37	40823364;-35	33322144
62	3461731;22	45258179;-244	4758057
45	36156921;14	3312149;-295	7124756
62	80807495;17	54517212;-309	710498
57	20663452;17	50545959;-315	1587891
56	90821533;22	18960724;-312	4313232
41	58865356;17	99060364;-295	9158203
40	91838074;17	82599792;-302	8230957
46	35804749;17	06907043;-311	1276367
47	68336487;28	07177734;-303	616626
47	94308167;28	48799744;-297	3078369
75	03355103;32	05148621;-21	29634247
56	27921143;26	50527649;-253	1707031
59	8276001;22	02721405;-252	7916016
57	62151489;21	84925385;-261	5012939
55	31561279;21	11591034;-270	3748779
52	92363281;19	72601013;-279	1575195
62	459021;22	46582336;-254	3890869
62	52877808;23	00982513;-263	9049805
61	81589966;22	82732391;-273	6067871
60	65132446;21	90265503;-282	5611084
40	64584961;17	32142944;-299	5950684
43	5440918;16	82951202;-307	9508301
47	70202637;22	82723236;-307	9799561
47	86344604;28	95725098;-301	2040039
43	41690063;22	29526672;-295	052124
43	74726868;21	88800354;-303	3493896
73	90537109;29	62067566;-23	20209961
71	77203979;27	3555603;-25	44860382
69	46254272;27	54978333;-28	52438049
68	29140625;32	78139343;-30	91748352
70	18119507;38	25325623;-28	95429688
73	84030762;36	71766357;-23	90799255
60	11462402;20	48517914;-290	9707275
60	7609314;19	50366364;-297	701416
50	20126038;17	51550598;-287	6163818
61	73265991;18	51991882;-303	8900879
46	19000244;26	16139526;-295	9180664
45	93537903;26	31888733;-298	6029297
42	72613525;21	65762634;-297	8658691
46	01277771;26	29263306;-301	6483154
42	61272888;21	44059906;-300	9438477
46	35960693;23	60106506;-305	9072021
43	04345093;19	28078613;-305	2410156
45	12583618;19	55253906;-307	5795166
60	63681641;21	77639771;-259	1164307
58	36033325;21	3691925;-265	6128418
60	42605591;21	64045105;-269	4782471
55	86269531;20	51160431;-273	7675049
58	93098755;20	7205307;-276	9070557
54	38488159;19	12586365;-282	3165771
57	48092041;19	33041382;-285	3303223
51	19347534;16	59629974;-290	5758789
56	48609619;17	59922485;-292	6322266
47	52033386;13	46139832;-296	7635254
52	3166748;14	07233887;-297	7647461
57	56318359;15	79433136;-299	8704102
44	76037598;13	1825592;-298	5909424
49	08027649;12	09084549;-302	0317139
53	69036865;12	73252029;-304	6036621
58	99932861;14	7111969;-306	9523926
42	60194092;13	61759949;-300	879248
46	2101593;12	30546951;-305	0048096
51	7517395;12	24085312;-307	7161865
58	10847778;14	18272858;-310	454541
44	32623901;13	94246674;-307	0750977
49	25445251;12	84464264;-310	8439209
50	00196228;29	58453064;-304	1893555
53	7592041;28	921875;-306	489502
49	76509094;27	64936523;-306	2537598
55	22956543;26	26139832;-308	0443604
49	45082397;24	88166351;-307	9799805
52	28979492;21	7743866;-308	8333496
55	10685425;24	49961243;-308	6651123
54	75246582;26	27240295;-260	5376221
54	89862671;29	01491089;-264	0134766
52	25608521;25	76995239;-268	8951172
51	68314209;28	0881897;-273	0880615
52	90027466;30	24424133;-275	7295898
50	05167847;24	38770752;-278	8401855
50	27081604;27	69171143;-281	2531494
52	08547363;30	34723816;-284	6033936
47	27815552;21	63151398;-289	1335449
48	017276;25	41191559;-290	2003174
50	30444946;29	09924011;-290	7340088
52	60163574;31	6520874;-293	0032471
44	57803955;20	90061035;-293	2709717
60	70892334;31	6911499;-272	0640625
58	95657959;31	0630249;-279	598877
60	40219727;27	29845886;-284	9126709
57	87692261;30	34966736;-287	505249
60	05922852;26	57050476;-291	627417
60	69943237;22	96464996;-295	4205322
57	07798462;30	59974976;-292	5088623
59	03303833;27	64507446;-297	7552002
60	8111084;23	07016296;-301	9736328
55	46520386;31	6580658;-297	4861572
53	45859985;14	21047516;-312	4029785
58	99439087;16	0238266;-314	0655273
58	10007935;28	86976624;-302	5611328
60	97167969;22	6733963;-306	2635986
60	73135986;21	85339661;-310	4486572
73	17501221;33	16901245;-24	22215881
72	13392944;30	92285461;-25	30745239
70	67536011;29	3031189;-26	86114807
70	64487915;35	35752258;-27	15083008
69	71778564;32	15069275;-28	0524353
80	69993896;28	75738831;-20	8127182
67	7421875;22	66088715;-33	3677887
74	05360107;40	5131073;-35	59985657
81	33439941;21	12841949;-31	85812073
74	82148438;19	1972168;-29	12238464
67	43268433;22	85006409;-30	96072693
73	05484619;21	66237488;-27	17662964
82	58439331;24	11439972;-27	36269836
81	79528809;27	16651917;-22	46150055
67	83086548;33	84881592;-32	58789063
67	44038086;29	42904968;-31	80684509
66	67017822;26	13289185;-32	56090698
80	41054688;34	58097839;-26	29842834
78	07645874;22	7151825;-26	49890747
68	98370361;37	12504272;-33	84047852
84	72209473;27	37929688;-26	72145386
67	1729187;31	98158264;-34	25715942
82	94605103;32	12308044;-27	89533386
73	78643188;39	57606506;-29	76769714
78	72739868;20	01236115;-28	47716064
71	83224487;39	76087646;-33	01897583
68	96751099;37	50816956;-31	44150391
83	37950439;31	25660095;-24	92617493
77	25166626;37	38227234;-26	10996399
84	19973145;27	84172974;-29	05957947
82	01416016;22	25264435;-29	14414368
77	13062134;19	21952209;-30	91609802
82	70960693;30	80424194;-22	11230316
80	71671143;25	29233551;-24	79526672
79	2743103;33	92067566;-23	24174042
70	43422241;21	54279785;-29	01581421
79	68579102;37	08808289;-29	60068054
71	16314697;20	74661102;-31	28989868
84	2499939;27	69012451;-24	05828247
83	44962769;25	4420929;-30	44957275
76	82744141;39	25758667;-30	85400391
72	08339233;16	70338898;-274	0434082
66	02417603;7	139421844;-312	0525635
79	21642456;19	44443054;-327	0260986
74	38164673;17	41334534;-334	3932617
71	20533447;21	57910614;-329	5323975
60	30846558;9	117690277;-314	6311279
61	87858276;9	971414948;-322	7005615
66	8041748;13	76646729;-333	994751
62	01226807;23	39296112;-322	8272949
60	58847046;23	21473846;-316	3241455
86	41646729;32	63927002;-20	85439453
63	89717407;18	89461212;-290	7865479
70	82272949;14	99748077;-283	6917725
69	7420166;13	93783264;-290	1105225
68	9284668;12	91526642;-295	3964111
68	24470215;11	65376282;-300	477002
73	94649658;18	36856079;-284	4535645
74	46472168;18	63375702;-291	1338135
74	9487915;18	84669342;-296	8921631
75	44215698;19	17769165;-302	5236328
60	743396;8	657341766;-318	8587158
65	62088013;10	53722534;-328	9653076
64	53589478;19	09420319;-328	3604004
61	52369995;23	96352997;-319	8575195
59	46497803;13	97508392;-312	9223389
61	97131348;15	69266815;-324	0543945
86	93295898;28	67246704;-21	62335052
85	32674561;25	48058319;-23	42574463
80	85043335;24	8372757;-24	91275635
77	87133789;28	77728882;-25	41064301
77	40762939;33	26445618;-24	60255737
82	53776245;34	88091431;-22	80015869
76	16307983;20	13626709;-308	0384033
77	01353149;20	25891571;-314	0984375
67	59202271;9	865377808;-305	7180664
78	22176514;20	06942444;-320	2906738
60	38549805;19	70982361;-313	6946289
60	81987305;20	19403229;-317	1064697
60	39606323;13	76827698;-316	6094482
61	40911865;20	68369446;-320	7855469
61	00315552;14	20031891;-320	791626
62	77659912;18	98931274;-326	5010498
63	29578857;13	163797;-326	4919678
64	06217041;14	9087204;-329	6408691
72	79078369;15	78731384;-288	1827637
71	34823608;14	42591553;-292	4543457
73	84682007;16	22438202;-294	5113281
70	35421753;13	11860046;-297	2571777
73	6296936;15	55612335;-298	837915
70	59015503;12	44827347;-302	210498
74	00151367;15	27467346;-304	0334961
69	67769165;10	4907341;-307	7074951
74	94154663;14	94168091;-309	1107666
68	62640991;7	747399902;-313	0566406
72	64255981;11	1678421;-314	0421387
76	49041748;15	50488892;-316	1271729
66	41273804;6	522134399;-315	615332
71	02232056;8	610066223;-319	0710205
74	4309021;11	91333694;-321	6607422
77	54303589;15	89167328;-323	9307129
64	73665161;6	425691986;-319	320874
69	02733765;8	162399292;-323	4166504
73	29508667;11	07924118;-325	8621826
77	0633728;15	14206696;-328	2912598
67	315271;9	006562042;-326	7854492
70	68313599;12	01772614;-330	4805176
63	62720337;25	42198029;-322	0714111
67	14611206;25	99821472;-323	0445313
64	77911377;23	80972137;-324	1762207
68	98225708;24	36052246;-325	0229736
65	32800903;21	33684082;-326	3398682
67	91436768;20	19641113;-327	9716797
69	25978394;22	78009644;-326	1095947
63	6642334;17	94557648;-292	7431641
62	66149292;21	80110168;-294	7012939
63	28827515;17	11066284;-296	3667236
61	98323364;20	15805969;-298	8744141
61	86009521;24	13308105;-300	5076172
63	03668213;15	69767761;-301	3154297
61	74352417;20	31827698;-302	9575928
61	5272522;25	13723907;-305	5884277
61	74453125;13	13929901;-307	2506592
60	35700684;18	38092041;-308	6239746
60	91509399;24	03549347;-309	9373047
62	034375;28	11739807;-312	3022217
60	39171143;12	43434296;-310	632959
67	98771973;29	4161499;-298	2443359
67	34226074;29	12883301;-302	4350586
71	38084106;25	72488708;-304	7050049
67	1425354;28	80997314;-307	3946777
71	70769653;25	96275635;-309	3170166
74	86740723;23	24524384;-312	158374
66	65807495;29	10201111;-311	3879639
70	85507813;27	30726929;-314	9605957
74	86709595;23	58708801;-318	4829102
65	29872437;29	52762146;-315	8265625
73	31209717;13	83811646;-331	9642822
76	88907471;16	750914;-332	751416
69	8434082;28	05918274;-319	5860596
75	215448;23	34496918;-322	9188477
75	23927612;22	76122131;-327	6671631
83	84650269;31	49067688;-22	18501587
84	05761719;28	90766907;-22	7715744
82	70319824;26	92090759;-23	82378387
79	95464478;31	66688232;-23	68014069
80	40974121;28	88908997;-24	04150543
90	34312134;32	27128296;-19	75926971
80	1580853;20	36353959;-32	4038043
78	87338257;37	57034302;-33	53242493
92	94623413;19	21474152;-34	41974182
89	40183716;17	91084442;-29	16568298
80	23711025;19	98157323;-28	549242
88	17385864;20	21241608;-25	84896851
94	48496094;24	91173248;-28	6895813
92	8546814;29	62141113;-22	36034698
75	79267578;29	24194641;-27	69372559
77	22772217;25	55441284;-27	47898865
77	07939453;22	25065613;-29	17557373
88	32442627;35	22683411;-27	15424194
91	65888062;22	44743347;-26	76723633
75	44118652;32	44448547;-30	00686035
94	12684937;29	33553467;-28	19353027
75	44099121;27	56038513;-30	22657471
91	01891479;33	34756775;-29	39326477
79	81669312;36	65242615;-27	51940308
92	17417603;19	50614014;-29	69402161
76	95806885;36	1552002;-29	906427
75	73342285;32	11598816;-27	06362915
92	068573;33	15645142;-26	30220337
84	359729;36	23644714;-25	87664185
93	64581299;29	07687988;-30	94008789
94	17626343;22	17957611;-31	05801697
90	88197632;17	39741669;-32	16520996
92	293396;33	96229248;-23	19433899
92	83935547;26	28497009;-24	97026825
88	26096191;34	96372986;-23	93172302
84	663428;19	78499681;-27	49570526
85	7050415;36	11088867;-30	29230042
84	91587069;19	14506528;-30	68609497
93	8852417;30	36630859;-25	01368561
94	30368042;25	95907288;-32	79764099
82	27904053;37	68608704;-30	11531677
61	60678711;19	26545105;-306	8084229
52	19708252;8	810812378;-357	3332275
68	64176025;21	34803925;-375	247168
63	55061035;18	27815094;-379	0405029
61	02719116;24	84620667;-372	4813721
48	86391296;11	10442734;-357	7255127
49	55240784;11	57613831;-365	5931396
56	16541748;13	12701111;-375	1855957
51	16192322;20	9018631;-367	2657227
51	28202515;23	15898895;-359	4787109
81	59517212;35	37808228;-37	35054626
56	3864624;21	03439178;-311	3628174
59	34280396;18	57576904;-312	2351807
57	39559326;17	54212341;-320	0245605
57	03463135;16	52632141;-328	807251
56	02052612;15	10518036;-338	0051514
62	98292847;20	37362366;-313	9813721
64	19571533;21	77507629;-322	8897949
64	54385376;22	02516632;-333	0041748
64	51266479;22	06033478;-342	7926025
49	37172546;10	28180237;-362	0263672
53	79023438;11	38015213;-371	2385742
54	56252441;18	6303421;-371	2109619
51	22802734;23	32060242;-363	9329346
49	39588623;15	57322998;-355	9062256
50	42779846;15	38183441;-366	9479492
84	13833008;27	61154785;-37	73644714
81	56362915;22	46538086;-40	41523132
76	50469971;21	09889984;-42	7077179
73	94935913;27	11238708;-44	79970093
73	77016602;33	21819153;-42	83611755
78	04024048;35	38932495;-39	35509033
65	09672852;21	38290863;-352	2118164
66	73828125;21	0394516;-360	2020264
54	59689941;12	64267197;-347	4212646
68	76589966;21	74384613;-368	0084717
50	72313843;20	29079742;-356	679248
50	41314392;20	04753876;-360	8897217
49	57359619;14	73222504;-359	9454346
50	49501953;19	46346588;-364	9155762
49	48352661;14	62966919;-363	8844971
52	37306519;17	86017456;-369	5995117
51	4137207;13	32267303;-368	6656494
53	52449341;14	49581604;-371	3769043
60	95916748;19	24536285;-318	0658447
59	56638184;18	24498749;-324	219873
62	44715576;20	0545929;-328	4960938
58	50014648;16	97568665;-332	5446533
62	00345459;19	2373291;-336	2625488
58	42820435;15	49625397;-341	700415
61	80839233;18	09494629;-345	5323975
56	91272583;11	97759476;-350	9420166
62	52554932;16	50974121;-353	9238037
55	47591553;8	562567139;-358	7786865
60	88916016;11	57970352;-360	0679688
65	53117065;16	25751953;-362	8948975
53	63655396;8	184513855;-360	839502
59	0022522;9	819797516;-365	1494629
63	54065552;12	32051926;-368	3355225
67	25602417;16	78919983;-371	5177979
52	5385437;8	389944458;-363	7391357
56	8855896;9	541441345;-368	2582031
62	10467529;11	43138351;-371	5517334
66	35068359;15	98643799;-375	0155518
55	31557007;9	886756897;-370	3459473
59	76738892;11	34713287;-374	5537598
53	66048584;24	61476898;-366	169165
57	76971436;26	11824646;-367	1864014
54	56694336;22	56693878;-368	3467773
59	54182739;25	1683075;-369	1172119
55	33088379;20	74190674;-369	9579102
58	20856323;20	49187775;-370	6905029
59	80522461;23	89061432;-369	6704102
55	44277344;21	00569305;-318	4757813
55	59202271;24	53623962;-321	8905273
54	3784729;20	55973206;-327	052417
53	73579102;23	23509216;-331	3536865
54	76436157;26	19559937;-334	0343994
53	18754272;18	77983246;-337	2969238
52	91487427;22	72024231;-339	838208
54	09790649;26	56850281;-343	4181885
51	76029053;15	39430237;-348	5001709
51	93561401;19	9299408;-349	5261963
52	7956604;24	91065979;-350	2668457
54	599646;28	66459961;-353	1174072
50	07179565;14	243573;-353	3575684
61	25406494;30	97631531;-330	7737549
60	25779419;30	55220947;-338	6259277
62	51553955;27	25682373;-344	5436279
59	66713257;29	78282166;-347	0873291
63	01001587;26	92587891;-351	9920898
65	30736084;24	2976593;-357	037207
59	11364136;29	89819641;-352	6983643
62	5086853;28	70288391;-358	9030273
65	80502319;25	18746796;-364	6796387
57	27206421;31	20656738;-357	9472412
62	40437622;13	92962189;-376	5184814
65	79528198;18	15927582;-378	2671143
61	31838379;29	4266449;-363	8182861
66	05409546;25	22347565;-369	389917
65	37321777;25	0074646;-373	3413574
79	73807373;31	83509827;-38	86585388
80	39979248;27	58594971;-39	35030823
78	76762085;24	204953;-41	00143127
75	98117676;31	23237305;-41	1592804
76	46408691;27	23710632;-41	95525208
88	94491577;28	94839172;-37	46886292
75	93182983;19	43059235;-51	62420044
72	46228027;37	29173584;-54	34904175
89	43620605;19	8088501;-54	26071777
85	6762085;15	6874115;-47	90335999
76	31218398;17	64110621;-47	91626221
83	81876831;17	10483398;-43	52685242
92	19746704;24	30043335;-47	28477173
91	69077759;27	57012024;-39	87385559
72	62468872;28	09003296;-47	77477417
74	05348511;23	73845673;-47	40198669
75	04271851;20	64503174;-50	03699341
84	80864868;36	18673096;-43	98349915
88	90389404;20	58978424;-44	70485229
72	32178345;32	01351013;-50	09923096
92	78949585;29	20639954;-46	51382751
72	82675171;26	43553467;-51	04274902
88	64350586;33	98734436;-47	12536621
74	39199219;37	03248291;-45	2700531
89	35282593;17	83823547;-48	30688477
72	1867981;35	93772278;-49	50307922
72	6635437;32	18269958;-46	28839722
90	28670044;33	42111511;-43	63262939
79	871698;38	13908081;-42	46681213
91	91984863;29	44181213;-49	75020752
91	50813599;21	73153534;-50	05581055
87	00697632;16	75320129;-51	56240845
90	54119263;33	16107483;-40	30353699
90	72888794;25	08601532;-42	91651917
84	51186523;36	53545532;-40	44056702
80	37327865;16	96502731;-45	84955184
81	77476807;36	76756287;-47	62345886
80	74650338;17	49046991;-49	64529045
93	2381897;29	40481873;-42	85074463
91	44376831;26	23523254;-51	8524353
77	67497559;34	5157196;-46	27717896
129	3393555;-18	62939606;-274	3300537
118	3823853;-11	6143692;-326	4262207
126	8302368;-28	66964722;-341	1081787
126	6990601;-24	94095764;-349	1250977
131	7077148;-20	63910828;-342	3061523
124	7252319;-6	168340683;-326	2971436
123	1384521;-6	359827423;-336	6523193
124	0790039;-12	86933746;-346	9501465
134	1472168;-12	00089798;-336	1331787
135	9020996;-12	04041824;-329	43479
135	7995972;-20	22707062;-16	93232574
132	7292847;-11	29487228;-292	3951172
[truncated: 17,312 more rows]
