# Supplementary material for: Sexual Dimorphism in the Fibular Extremities of Italians and South Africans of Identified Modern Human Skeletal Collections: A Geometric Morphometric Approach
Source: Biology (Basel). 2022 Jul 19;11(7):1079. doi: 10.3390/biology11071079 (PMC9312998; doi:10.3390/biology11071079)
Supplement: Supplementary file 1 [file biology-11-01079-s001.zip › S2_Appendix.CSV]

Label	Population	Sex	Age	Conv	Conv1
SS_14_F_L	Sassari	F	33	Sardinia	Sardinia F
SS_25_F_L	Sassari	F	54	Sardinia	Sardinia F
SS_28_F_L	Sassari	F	40	Sardinia	Sardinia F
SS_31_F_L	Sassari	F	53	Sardinia	Sardinia F
SS_33_F_L	Sassari	F	68	Sardinia	Sardinia F
SS_41_F_L	Sassari	F	49	Sardinia	Sardinia F
SS_48_F_L	Sassari	F	40	Sardinia	Sardinia F
SS_55_F_L	Sassari	F	22	Sardinia	Sardinia F
SS_96_F_L	Sassari	F	23	Sardinia	Sardinia F
SS_151_F_L	Sassari	F	50	Sardinia	Sardinia F
SS_163_F_L	Sassari	F	26	Sardinia	Sardinia F
SS_254_F_L	Sassari	F	22	Sardinia	Sardinia F
SS_104_F_L	Sassari	F	42	Sardinia	Sardinia F
SS_251_F_L	Sassari	F	28	Sardinia	Sardinia F
SS_7_F_L	Sassari	F	57	Sardinia	Sardinia F
SS_47_F_L	Sassari	F	44	Sardinia	Sardinia F
SS_23_M_L	Sassari	M	23	Sardinia	Sardinia M
SS_26_M_L	Sassari	M	40	Sardinia	Sardinia M
SS_44_M_L	Sassari	M	40	Sardinia	Sardinia M
SS_74_M_L	Sassari	M	30	Sardinia	Sardinia M
SS_95_M_L	Sassari	M	29	Sardinia	Sardinia M
SS_105_M_L	Sassari	M	59	Sardinia	Sardinia M
SS_115_M_L	Sassari	M	54	Sardinia	Sardinia M
SS_155_M_L	Sassari	M	42	Sardinia	Sardinia M
SS_174_M_L	Sassari	M	25	Sardinia	Sardinia M
SS_185_M_L	Sassari	M	29	Sardinia	Sardinia M
SS_195_M_L	Sassari	M	25	Sardinia	Sardinia M
SS_215_M_L	Sassari	M	50	Sardinia	Sardinia M
SS_224_M_L	Sassari	M	21	Sardinia	Sardinia M
SS_234_M_L	Sassari	M	40	Sardinia	Sardinia M
SS_164_M_L	Sassari	M	41	Sardinia	Sardinia M
SS_165_M_L	Sassari	M	48	Sardinia	Sardinia M
SS_22_M_L	Sassari	M	41	Sardinia	Sardinia M
SS_41_M_L	Sassari	M	40	Sardinia	Sardinia M
SS_4_M_L	Sassari	M	40	Sardinia	Sardinia M
SS_3_M_L	Sassari	M	43	Sardinia	Sardinia M
SS_284_M_L	Sassari	M	38	Sardinia	Sardinia M
SS_203_M_L	Sassari	M	29	Sardinia	Sardinia M
SS_217_M_L	Sassari	M	26	Sardinia	Sardinia M
SS_117_F_L	Sassari	F	46	Sardinia	Sardinia F
SS_255_M_L	Sassari	M	17	Sardinia	Sardinia M
SS_294_M_L	Sassari	M	69	Sardinia	Sardinia M
SS_22_F_L	Sassari	F	42	Sardinia	Sardinia F
SS_235_M_L	Sassari	M	58	Sardinia	Sardinia M
SS_205_M_L	Sassari	M	22	Sardinia	Sardinia M
BO_94_F_L	Bologna	F	24	Emilia-Romagna	Emilia-Romagna F
BO_7_F_L	Bologna	F	64	Emilia-Romagna	Emilia-Romagna F
BO_18_F_L	Bologna	F	32	Emilia-Romagna	Emilia-Romagna F
BO_20_M_L	Bologna	M	74	Emilia-Romagna	Emilia-Romagna M
BO_28_M_L	Bologna	M	21	Emilia-Romagna	Emilia-Romagna M
BO_30_M_L	Bologna	M	25	Emilia-Romagna	Emilia-Romagna M
BO_37_M_L	Bologna	M	65	Emilia-Romagna	Emilia-Romagna M
BO_53_F_L	Bologna	F	66	Emilia-Romagna	Emilia-Romagna F
BO_54_F_L	Bologna	F	30	Emilia-Romagna	Emilia-Romagna F
BO_60_M_L	Bologna	M	66	Emilia-Romagna	Emilia-Romagna M
BO_63_M_L	Bologna	M	69	Emilia-Romagna	Emilia-Romagna M
BO_68_M_L	Bologna	M	28	Emilia-Romagna	Emilia-Romagna M
BO_70_F_L	Bologna	F	25	Emilia-Romagna	Emilia-Romagna F
BO_73_F_L	Bologna	F	28	Emilia-Romagna	Emilia-Romagna F
BO_79_F_L	Bologna	F	72	Emilia-Romagna	Emilia-Romagna F
BO_79_M_L	Bologna	M	35	Emilia-Romagna	Emilia-Romagna M
BO_89_F_L	Bologna	F	35	Emilia-Romagna	Emilia-Romagna F
BO_95_M_L	Bologna	M	56	Emilia-Romagna	Emilia-Romagna M
BO_125_M_L	Bologna	M	70	Emilia-Romagna	Emilia-Romagna M
BO_130_M_L	Bologna	M	57	Emilia-Romagna	Emilia-Romagna M
BO_133_M_L	Bologna	M	19	Emilia-Romagna	Emilia-Romagna M
BO_140_F_L	Bologna	F	71	Emilia-Romagna	Emilia-Romagna F
BO_158_M_L	Bologna	M	49	Emilia-Romagna	Emilia-Romagna M
BO_164_M_L	Bologna	M	70	Emilia-Romagna	Emilia-Romagna M
BO_108_F_L	Bologna	F	84	Emilia-Romagna	Emilia-Romagna F
BO_19_F_L	Bologna	F	37	Emilia-Romagna	Emilia-Romagna F
BO_20_F_L	Bologna	F	43	Emilia-Romagna	Emilia-Romagna F
BO_27_F_L	Bologna	F	28	Emilia-Romagna	Emilia-Romagna F
BO_30_F_L	Bologna	F	31	Emilia-Romagna	Emilia-Romagna F
BO_34_M_L	Bologna	M	39	Emilia-Romagna	Emilia-Romagna M
BO_35_F_L	Bologna	F	24	Emilia-Romagna	Emilia-Romagna F
B0_36_F_L	Bologna	F	25	Emilia-Romagna	Emilia-Romagna F
BO_50_F_L	Bologna	F	45	Emilia-Romagna	Emilia-Romagna F
BO_51_F_L	Bologna	F	56	Emilia-Romagna	Emilia-Romagna F
BO_59_M_L	Bologna	M	62	Emilia-Romagna	Emilia-Romagna M
BO_65_F_L	Bologna	F	60	Emilia-Romagna	Emilia-Romagna F
BO_80_F_L	Bologna	F	35	Emilia-Romagna	Emilia-Romagna F
BO_80_M_L	Bologna	M	50	Emilia-Romagna	Emilia-Romagna M
BO_82_M_L	Bologna	M	61	Emilia-Romagna	Emilia-Romagna M
BO_90_F_L	Bologna	F	47	Emilia-Romagna	Emilia-Romagna F
BO_93_M_L	Bologna	M	44	Emilia-Romagna	Emilia-Romagna M
BO_96_F_L	Bologna	F	77	Emilia-Romagna	Emilia-Romagna F
BO_99_F_L	Bologna	F	18	Emilia-Romagna	Emilia-Romagna F
BO_114_M_L	Bologna	M	18	Emilia-Romagna	Emilia-Romagna M
BO_154_M_L	Bologna	M	50	Emilia-Romagna	Emilia-Romagna M
SS_65_F_L	Sassari	F	78	Sardinia	Sardinia F
SS_33_M_L	Sassari	M	20	Sardinia	Sardinia M
SS_75_F_L	Sassari	F	88	Sardinia	Sardinia F
SS_296_M_L	Sassari	M	62	Sardinia	Sardinia M
SS_293_M_L	Sassari	M	39	Sardinia	Sardinia M
SS_283_M_L	Sassari	M	80	Sardinia	Sardinia M
SS_244_M_L	Sassari	M	58	Sardinia	Sardinia M
SS_194_M_L	Sassari	M	45	Sardinia	Sardinia M
SS_175_F_L	Sassari	F	17	Sardinia	Sardinia F
SS_154_F_L	Sassari	F	20	Sardinia	Sardinia F
SS_144_M_L	Sassari	M	50	Sardinia	Sardinia M
SS_133_M_L	Sassari	M	21	Sardinia	Sardinia M
SS_125_F_L	Sassari	F	33	Sardinia	Sardinia F
SS_124_F_L	Sassari	F	44	Sardinia	Sardinia F
CA_2_M_L	Cagliari	M	42	Sardinia	Sardinia M
CA_4_M_L	Cagliari	M	33	Sardinia	Sardinia M
CA_14_M_L	Cagliari	M	22	Sardinia	Sardinia M
CA_15_M_L	Cagliari	M	55	Sardinia	Sardinia M
CA_16_F_L	Cagliari	F	23	Sardinia	Sardinia F
CA_21_F_L	Cagliari	F	29	Sardinia	Sardinia F
CA_22_F_L	Cagliari	F	38	Sardinia	Sardinia F
CA_23_F_L	Cagliari	F	35	Sardinia	Sardinia F
CA_24_M_L	Cagliari	M	34	Sardinia	Sardinia M
CA_34_M_L	Cagliari	M	25	Sardinia	Sardinia M
CA_43_F_L	Cagliari	F	40	Sardinia	Sardinia F
CA_45_M_L	Cagliari	M	21	Sardinia	Sardinia M
N_63_M_L	Nuoro	M	40	Sardinia	Sardinia M
PA_3_M_L	Parma	M	72	Emilia-Romagna	Emilia-Romagna M
PA_4_M_L	Parma	M	40	Emilia-Romagna	Emilia-Romagna M
A3_Fib_R_flipped	South Africa	M	41	South Africa	South Africa M
A9_Fibula_R_flipped	South Africa	M	20	South Africa	South Africa M
A21_Fibula_R_flipped	South Africa	F	90	South Africa	South Africa F
A3459_Fibula_R_flipped	South Africa	F	33	South Africa	South Africa F
A3461_Fibula_R_flipped	South Africa	F	21	South Africa	South Africa F
A3509_Fibula_R_flipped	South Africa	F	32	South Africa	South Africa F
A3616_Fibula_R_flipped	South Africa	F	30	South Africa	South Africa F
A3653_Fibula_R_flipped	South Africa	F	25	South Africa	South Africa F
A98_FIBULA_ND_R	South Africa	M	40	South Africa	South Africa M
A170_FIBULA_M_R	South Africa	M	29	South Africa	South Africa M
A883_FIBULA_F_R	South Africa	F	27	South Africa	South Africa F
A1892_FIBULA_M_R	South Africa	M	40	South Africa	South Africa M
A1899_FIBULA_M_R	South Africa	M	36	South Africa	South Africa M
A3456_Fibula_F_R	South Africa	F	31	South Africa	South Africa F
A3499_Fibula_f_R	South Africa	F	31	South Africa	South Africa F
A3691_Fibula_F_L	South Africa	F	31	South Africa	South Africa F
A3894_Fibula_M_R	South Africa	M	35	South Africa	South Africa M
